# Supplementary material for: Growth Mode and Carbon Source Impact the Surfaceome Dynamics of Lactobacillus rhamnosus GG
Source: Front Microbiol. 2019 Jun 5;10:1272. doi: 10.3389/fmicb.2019.01272 (PMC6560171; doi:10.3389/fmicb.2019.01272)
Supplement: Supplementary file 4 [file Table_4.XLSX]

## Sheet: Sheet1
Table S4. Comparison of the identified surfaceomes between the planktonic and biofilm GG cells grown on glucose and fructose. Identification (after the combined search with each three replica mass spectra) was considered reliable when the protein in question was identified in at least 2/3 replicates ([ms] ³ 30, p < 0.05). BC, biofilm cells; PC, planktonic cells. Glc, glucose; Frc, fructose. Prote…
					CLASSICAL SECRETION	SUBCELLULAR LOCATION		NON-CLASSICAL SECRETION	PREDICTED SECRETION PATHWAY	UNIPROT PROTEOME GENE ONTOLOGY (GO) ID			GROWTH ON GLUCOSE						GROWTH ON FRUCTOSE						Fold-changes GLC		Fold-changes FRC		Fold-changes BC		Fold-changes PC
Accession		Description	Mr (Da)	pI	#SignalP5.0 SPI= Sec-type signal peptide Sec/SPII=Lipoprotein signal peptide Other=No signal peptide	#TMHMM2.0 number of TMDs	#PSORTb3.0 U=Unknown C=cytoplasmic CM=cytoplasmic/Membrane	#SecP2.0 Y=YES N=NO+H3:L5H4:I5	NC=Non-classical C=Classical NM=Predicted new moonlighter	Biological process	Molecular function	Cellular component	BC-Mascot score [ms]	BC-No. match. pept.	BC-emPAI	PC-Mascot score [ms]	PC-No. match. pept.	PC-emPAI	BC-Mascot score [ms]	BC-No. match. pept.	BC-emPAI	PC-Mascot score [ms]	PC-No. match. pept.	PC-emPAI	BC/PC	PC/BC	BC/PC	PC/BC	Frc/Glc	Glc/Frc	Frc/Glc	Glc/Frc
gi|258508384|	YP_003171135.1	30S ribosomal protein S1	47143	4.9	OTHER	0	Cytoplasmic	N	NM		nucleic acid binding [GO:0003676]	ribosome [GO:0005840]	1545	37	1.14	41	3	0.08	1671	37	1.14	206	9	0.36	14.25	0.0701754	3.16667	0.315789	1	1	4.5	0.222222
gi|258509483|	YP_003172234.1	30S ribosomal protein S10	11714	10.51	OTHER	1	Cytoplasmic	Y	NC	translation [GO:0006412]	structural constituent of ribosome [GO:0003735]; tRNA binding [GO:0000049]	ribosome [GO:0005840]	526	17	1.39	162	7	1.39	665	19	1.39	205	10	1.39	1	1	1	1	1	1	1	1
gi|258509457|	YP_003172208.1	30S ribosomal protein S11	13763	12.16	OTHER	0	Cytoplasmic	N	NM	translation [GO:0006412]	rRNA binding [GO:0019843]; structural constituent of ribosome [GO:0003735]	ribosome [GO:0005840]	232	8	0.65	79	2	0.29	202	7	1.12	89	1	0.29	2.24138	0.446154	3.86207	0.258929	1.72308	0.580357	1	1
gi|258509490|	YP_003172241.1	30S ribosomal protein S12	15152	11.96	OTHER	1	Cytoplasmic	Y	NC	translation [GO:0006412]	rRNA binding [GO:0019843]; structural constituent of ribosome [GO:0003735]; tRNA binding [GO:0000049]	small ribosomal subunit [GO:0015935]	224	8	0.58	83	3	0.26	216	8	0.58	97	4	0.26	2.23077	0.448276	2.23077	0.448276	1	1	1	1
gi|258509458|	YP_003172209.1	30S ribosomal protein S13	13548	11.16	OTHER	0	Cytoplasmic	N	NM	translation [GO:0006412]	rRNA binding [GO:0019843]; structural constituent of ribosome [GO:0003735]; tRNA binding [GO:0000049]	ribosome [GO:0005840]	130	5	0.66	79	2	0.29	181	6	0.66	100	3	0.29	2.27586	0.439394	2.27586	0.439394	1	1	1	1
gi|258508638|	YP_003171389.1	30S ribosomal protein S16	10515	10.87	OTHER	0	Cytoplasmic	Y	NC	translation [GO:0006412]	structural constituent of ribosome [GO:0003735]	ribosome [GO:0005840]	460	10	0.9	85	1	0.38	468	11	1.63	99	1	0.38	2.36842	0.422222	4.28947	0.233129	1.81111	0.552147	1	1
gi|258509473|	YP_003172224.1	30S ribosomal protein S17	10095	10.5	OTHER	0	Cytoplasmic	Y	NC	translation [GO:0006412]	rRNA binding [GO:0019843]; structural constituent of ribosome [GO:0003735]	ribosome [GO:0005840]	65	2	0.4	0	0	0	63	2	0.4	0	0	0	#DIV/0!	0	#DIV/0!	0	1	1	#DIV/0!	#DIV/0!
gi|258507008|	YP_003169759.1	30S ribosomal protein S18	9122	11.88	OTHER	0	Cytoplasmic	N	NM	translation [GO:0006412]	rRNA binding [GO:0019843]; structural constituent of ribosome [GO:0003735]	ribosome [GO:0005840]		5	1.09	0	0	0	223	9	1.09	84	3	0.45	#DIV/0!	0	2.42222	0.412844	1	1	#DIV/0!	0
gi|258509478|	YP_003172229.1	30S ribosomal protein S19	10571	10.83	OTHER	0	Cytoplasmic	N	NM	translation [GO:0006412]	rRNA binding [GO:0019843]; structural constituent of ribosome [GO:0003735]	small ribosomal subunit [GO:0015935]	186	5	0.9	72	2	0.38	175	7	0.9	55	2	0.38	2.36842	0.422222	2.36842	0.422222	1	1	1	1
gi|258508623|	YP_003171374.1	30S ribosomal protein S2	29623	4.99	OTHER	0	Cytoplasmic	N	NM	translation [GO:0006412]	structural constituent of ribosome [GO:0003735]	small ribosomal subunit [GO:0015935]	859	26	1.06	159	6	0.27	966	32	1.62	184	12	0.43	3.92593	0.254717	3.76744	0.265432	1.5283	0.654321	1.59259	0.627907
gi|258509476|	YP_003172227.1	30S ribosomal protein S3	24933	10.65	OTHER	0	Cytoplasmic	N	NM	translation [GO:0006412]	mRNA binding [GO:0003729]; rRNA binding [GO:0019843]; structural constituent of ribosome [GO:0003735]	small ribosomal subunit [GO:0015935]	226	7	0.53	0	0	0	183	4	0.33	0	0	0	#DIV/0!	0	#DIV/0!	0	0.622642	1.60606	#DIV/0!	#DIV/0!
gi|258508250|	YP_003171001.1	30S ribosomal protein S4	23318	10.23	OTHER	0	Unknown	N	NM	translation [GO:0006412]	rRNA binding [GO:0019843]; structural constituent of ribosome [GO:0003735]	small ribosomal subunit [GO:0015935]	551	23	1.48	0	0	0	613	14	1.13	184	5	0.58	#DIV/0!	0	1.94828	0.513274	0.763514	1.30973	#DIV/0!	0
gi|258509465|	YP_003172216.1	30S ribosomal protein S5	17508	7.8	OTHER	0	Cytoplasmic	N	NM	translation [GO:0006412]	rRNA binding [GO:0019843]; structural constituent of ribosome [GO:0003735]	small ribosomal subunit [GO:0015935]	985	23	2.31	106	1	0.22	403	14	2.31	167	3	0.49	10.5	0.0952381	4.71429	0.212121	1	1	2.22727	0.44898
gi|258507006|	YP_003169757.1	30S ribosomal protein S6	11566	4.79	OTHER	0	Cytoplasmic	Y	NC	translation [GO:0006412]	rRNA binding [GO:0019843]; structural constituent of ribosome [GO:0003735]	ribosome [GO:0005840]	371	10	0.81	34	1	0.34	383	9	0.81	0	0	0	2.38235	0.419753	#DIV/0!	0	1	1	0	#DIV/0!
gi|258509489|	YP_003172240.1	30S ribosomal protein S7	17912	10.49	OTHER	0	Cytoplasmic	N	NM	translation [GO:0006412]	rRNA binding [GO:0019843]; structural constituent of ribosome [GO:0003735]; tRNA binding [GO:0000049]	small ribosomal subunit [GO:0015935]	916	29	2.94	219	5	0.48	793	30	2.94	95	4	0.8	6.125	0.163265	3.675	0.272109	1	1	1.66667	0.6
gi|258509468|	YP_003172219.1	30S ribosomal protein S8	14765	10.14	OTHER	0	Cytoplasmic	N	NM	translation [GO:0006412]	rRNA binding [GO:0019843]; structural constituent of ribosome [GO:0003735]	ribosome [GO:0005840]	233	9	1.02	173	5	0.26	212	9	1.02	159	6	0.26	3.92308	0.254902	3.92308	0.254902	1	1	1	1
gi|258509442|	YP_003172193.1	30S ribosomal protein S9	14265	11.22	OTHER	1	Cytoplasmic	Y	NC	translation [GO:0006412]	structural constituent of ribosome [GO:0003735]	ribosome [GO:0005840]	153	7	0.27	81	5	0.27	161	5	0.27	130	5	0.27	1	1	1	1	1	1	1	1
gi|258509283|	YP_003172034.1	50S ribosomal protein L1	24514	9.91	OTHER	0	Cytoplasmic	N	NM	regulation of translation [GO:0006417]; translation [GO:0006412]	rRNA binding [GO:0019843]; structural constituent of ribosome [GO:0003735]; tRNA binding [GO:0000049]	large ribosomal subunit [GO:0015934]	897	26	1.75	42	2	0.16	1031	21	1.38	44	2	0.16	10.9375	0.0914286	8.625	0.115942	0.788571	1.26812	1	1
gi|258509272|	YP_003172023.1	50S ribosomal protein L10	18237	4.76	OTHER	0	Cytoplasmic	N	NM	ribosome biogenesis [GO:0042254]; translation [GO:0006412]	large ribosomal subunit rRNA binding [GO:0070180]; structural constituent of ribosome [GO:0003735]	ribosome [GO:0005840]	1025	23	1.62	96	3	0.47	862	21	2.84	214	9	0.78	3.44681	0.290123	3.64103	0.274648	1.75309	0.570423	1.65957	0.602564
gi|258509284|	YP_003172035.1	50S ribosomal protein L11	14871	9.61	OTHER	0	Cytoplasmic	N	NM	translation [GO:0006412]	large ribosomal subunit rRNA binding [GO:0070180]; structural constituent of ribosome [GO:0003735]	ribosome [GO:0005840]	353	10	1.01	30	1	0.26	557	11	1.54	0	0	0	3.88462	0.257426	#DIV/0!	0	1.52475	0.655844	0	#DIV/0!
gi|258509443|	YP_003172194.1	50S ribosomal protein L13	16564	10.22	OTHER	0	Unknown	N	NM	translation [GO:0006412]	structural constituent of ribosome [GO:0003735]	ribosome [GO:0005840]	446	10	1.32	0	0	0	265	5	0.88	0	0	0	#DIV/0!	0	#DIV/0!	0	0.666667	1.5	#DIV/0!	#DIV/0!
gi|258509472|	YP_003172223.1	50S ribosomal protein L14	13027	10.75	OTHER	0	Cytoplasmic	N	NM	translation [GO:0006412]	rRNA binding [GO:0019843]; structural constituent of ribosome [GO:0003735]	large ribosomal subunit [GO:0015934]	213	10	1.22	40	2	0.3	203	12	1.22	0	0	0	4.06667	0.245902	#DIV/0!	0	1	1	0	#DIV/0!
gi|258509463|	YP_003172214.1	50S ribosomal protein L15	15484	11.24	OTHER	1	Unknown	N	NM	translation [GO:0006412]	rRNA binding [GO:0019843]; structural constituent of ribosome [GO:0003735]	large ribosomal subunit [GO:0015934]	940	30	2.08	255	6	0.97	904	32	2.86	352	11	0.97	2.14433	0.466346	2.94845	0.339161	1.375	0.727273	1	1
gi|258509475|	YP_003172226.1	50S ribosomal protein L16	15999	11.41	OTHER	0	Cytoplasmic	N	NM	translation [GO:0006412]	rRNA binding [GO:0019843]; structural constituent of ribosome [GO:0003735]; tRNA binding [GO:0000049]	ribosome [GO:0005840]	309	6	0.24	0	0	0	240	5	0.24	0	0	0	#DIV/0!	0	#DIV/0!	0	1	1	#DIV/0!	#DIV/0!
gi|258509455|	YP_003172206.1	50S ribosomal protein L17	14153	10.72	OTHER	0	Cytoplasmic	N	NM	translation [GO:0006412]	structural constituent of ribosome [GO:0003735]	ribosome [GO:0005840]	439	16	1.65	124	2	0.28	446	12	1.65	273	6	0.63	5.89286	0.169697	2.61905	0.381818	1	1	2.25	0.444444
gi|258509466|	YP_003172217.1	50S ribosomal protein L18	13007	10.7	OTHER	0	Cytoplasmic	N	NM	translation [GO:0006412]	rRNA binding [GO:0019843]; structural constituent of ribosome [GO:0003735]	ribosome [GO:0005840]	236	5	0.7	0	0	0	133	4	0.3	0	0	0	#DIV/0!	0	#DIV/0!	0	0.428571	2.33333	#DIV/0!	#DIV/0!
gi|258508634|	YP_003171385.1	50S ribosomal protein L19	13342	11.65	OTHER	1	Cytoplasmic	N	NM	translation [GO:0006412]	structural constituent of ribosome [GO:0003735]	ribosome [GO:0005840]	0	0	0	0	0	0	83	6	0.3	0	0	0	#DIV/0!	#DIV/0!	#DIV/0!	0	#DIV/0!	0	#DIV/0!	#DIV/0!
gi|258509479|	YP_003172230.1	50S ribosomal protein L2	30378	11	OTHER	0	Unknown	Y	NC	translation [GO:0006412]	rRNA binding [GO:0019843]; structural constituent of ribosome [GO:0003735]; transferase activity [GO:0016740]	large ribosomal subunit [GO:0015934]	346	16	1.02	40	2	0.26	502	24	1.02	0	0	0	3.92308	0.254902	#DIV/0!	0	1	1	0	#DIV/0!
gi|258508740|	YP_003171491.1	50S ribosomal protein L20	13455	12.01	OTHER	4	Cytoplasmic	N	NM	ribosomal large subunit assembly [GO:0000027]; translation [GO:0006412]	rRNA binding [GO:0019843]; structural constituent of ribosome [GO:0003735]	ribosome [GO:0005840]	414	10	0.67	0	0	0	272	6	0.67	0	0	0	#DIV/0!	0	#DIV/0!	0	1	1	#DIV/0!	#DIV/0!
gi|258508685|	YP_003171436.1	50S ribosomal protein L21	11300	10.01	OTHER	0	Unknown	Y	NC	translation [GO:0006412]	rRNA binding [GO:0019843]; structural constituent of ribosome [GO:0003735]	ribosome [GO:0005840]	241	9	1.47	45	1	0.35	191	4	0.83	0	0	0	4.2	0.238095	#DIV/0!	0	0.564626	1.77108	0	#DIV/0!
gi|258509477|	YP_003172228.1	50S ribosomal protein L22	12722	10.62	OTHER	0	Cytoplasmic	N	NM	translation [GO:0006412]	rRNA binding [GO:0019843]; structural constituent of ribosome [GO:0003735]	large ribosomal subunit [GO:0015934]	847	13	1.24	232	4	0.71	921	15	1.94	209	3	0.31	1.74648	0.572581	6.25806	0.159794	1.56452	0.639175	0.43662	2.29032
gi|258509480|	YP_003172231.1	50S ribosomal protein L23	11525	10.61	OTHER	0	Cytoplasmic	N	NM	translation [GO:0006412]	rRNA binding [GO:0019843]; structural constituent of ribosome [GO:0003735]	ribosome [GO:0005840]	102	7	1.43	36	2	0.34	141	6	0.34	55	2	0.34	4.20588	0.237762	1	1	0.237762	4.20588	1	1
gi|258509471|	YP_003172222.1	50S ribosomal protein L24	11239	10.79	OTHER	1	Cytoplasmic	Y	NC	translation [GO:0006412]	rRNA binding [GO:0019843]; structural constituent of ribosome [GO:0003735]	ribosome [GO:0005840]	0	0	0	0	0	0	89	6	1.49	34	2	0.36	#DIV/0!	#DIV/0!	4.13889	0.241611	#DIV/0!	0	#DIV/0!	0
gi|258508683|	YP_003171434.1	50S ribosomal protein L27	10375	11.25	OTHER	0	Cytoplasmic	N	NM	translation [GO:0006412]	structural constituent of ribosome [GO:0003735]	ribosome [GO:0005840]	205	5	0.39	0	0	0	171	4	0.39	109	4	0.39	#DIV/0!	0	1	1	1	1	#DIV/0!	0
gi|258509474|	YP_003172225.1	50S ribosomal protein L29	8003	10.73	OTHER	0	Cytoplasmic	Y	NC	translation [GO:0006412]	structural constituent of ribosome [GO:0003735]	ribosome [GO:0005840]	165	9	1.3	66	3	1.3	373	16	4.27	157	6	2.48	1	1	1.72177	0.580796	3.28462	0.30445	1.90769	0.524194
gi|258509482|	YP_003172233.1	50S ribosomal protein L3	22613	10.47	OTHER	0	Cytoplasmic	Y	NC	translation [GO:0006412]	rRNA binding [GO:0019843]; structural constituent of ribosome [GO:0003735]	ribosome [GO:0005840]	1100	28	1.55	39	1	0.17	758	24	1.55	177	7	0.87	9.11765	0.109677	1.78161	0.56129	1	1	5.11765	0.195402
gi|258509539|	YP_003172290.1	50S ribosomal protein L31	9606	9.93	OTHER	1	Unknown	Y	NC	translation [GO:0006412]	structural constituent of ribosome [GO:0003735]	ribosome [GO:0005840]	131	8	0.42	0	0	0	68	6	0.42	0	0	0	#DIV/0!	0	#DIV/0!	0	1	1	#DIV/0!	#DIV/0!
gi|258508363|	YP_003171114.1	50S ribosomal protein L32	7077	11.24	OTHER	0	Cytoplasmic	Y	NC	translation [GO:0006412]	structural constituent of ribosome [GO:0003735]	large ribosomal subunit [GO:0015934]	269	6	1.52	37	2	1.52	245	4	0.59	0	0	0	1	1	#DIV/0!	0	0.388158	2.57627	0	#DIV/0!
gi|258508899|	YP_003171650.1	50S ribosomal protein L33	5858	11.42	OTHER	1	Cytoplasmic	Y	NC	translation [GO:0006412]	structural constituent of ribosome [GO:0003735]	ribosome [GO:0005840]	74	3	0.73	0	0	0	153	5	0.73	0	0	0	#DIV/0!	0	#DIV/0!	0	1	1	#DIV/0!	#DIV/0!
gi|258509481|	YP_003172232.1	50S ribosomal protein L4	22383	10.59	OTHER	1	Unknown	N	NM	translation [GO:0006412]	rRNA binding [GO:0019843]; structural constituent of ribosome [GO:0003735]	ribosome [GO:0005840]	1003	28	2.01	40	4	0.17	648	20	1.2	90	5	0.6	11.8235	0.0845771	2	0.5	0.597015	1.675	3.52941	0.283333
gi|258509470|	YP_003172221.1	50S ribosomal protein L5	20198	8.81	OTHER	0	Cytoplasmic	N	NM	translation [GO:0006412]	rRNA binding [GO:0019843]; structural constituent of ribosome [GO:0003735]; tRNA binding [GO:0000049]	ribosome [GO:0005840]	543	23	1.84	147	6	0.42	868	25	1.39	214	8	0.42	4.38095	0.228261	3.30952	0.302158	0.755435	1.32374	1	1
gi|258509467|	YP_003172218.1	50S ribosomal protein L6	19304	10.24	OTHER	0	Cytoplasmic	N	NM	translation [GO:0006412]	rRNA binding [GO:0019843]; structural constituent of ribosome [GO:0003735]	ribosome [GO:0005840]	131	6	0.44	0	0	0	119	4	0.2	0	0	0	#DIV/0!	0	#DIV/0!	0	0.454545	2.2	#DIV/0!	#DIV/0!
gi|258509271|	YP_003172022.1	50S ribosomal protein L7/L12	12582	4.24	OTHER	1	Cytoplasmic	N	NM	translation [GO:0006412]	structural constituent of ribosome [GO:0003735]	ribosome [GO:0005840]	1130	28	7.95	582	20	1.99	1413	32	7.95	827	23	2.93	3.99497	0.250314	2.71331	0.368553	1	1	1.47236	0.679181
gi|258508369|	YP_003171120.1	6-phosphofructokinase	34176	5.96	OTHER	0	Cytoplasmic	N	NM	fructose 6-phosphate metabolic process [GO:0006002]	6-phosphofructokinase activity [GO:0003872]; ATP binding [GO:0005524]; metal ion binding [GO:0046872]	cytoplasm [GO:0005737]	347	11	0.52	0	0	0	362	11	0.52	0	0	0	#DIV/0!	0	#DIV/0!	0	1	1	#DIV/0!	#DIV/0!
gi|258508722|	YP_003171473.1	6-phosphogluconate dehydrogenase	52117	5.14	OTHER	1	Cytoplasmic	N	NM	D-gluconate metabolic process [GO:0019521]; pentose-phosphate shunt [GO:0006098]	NADP binding [GO:0050661]; phosphogluconate dehydrogenase (decarboxylating) activity [GO:0004616]		272	13	0.41	0	0	0	347	17	0.41	0	0	0	#DIV/0!	0	#DIV/0!	0	1	1	#DIV/0!	#DIV/0!
gi|258509418|	YP_003172169.1	ABC transporter metal ion transporter periplasmic component/surface adhesin	33403	9.61	LIPO(Sec/SPII)	0	CytoplasmicMembrane	Y	C	metal ion transport [GO:0030001]	metal ion binding [GO:0046872]		0	0	0	0	0	0	983	27	0.9	160	4	0.24	#DIV/0!	#DIV/0!	3.75	0.266667	#DIV/0!	0	#DIV/0!	0
gi|258508647|	YP_003171398.1	ABC transporter oligopeptide-binding protein	66505	9.88	LIPO(Sec/SPII)	0	Extracellular	Y	C	transmembrane transport [GO:0055085]		ATP-binding cassette (ABC) transporter complex [GO:0043190]	459	19	0.39	402	14	0.46	2975	92	1.66	1887	59	1.39	0.847826	1.17949	1.19424	0.837349	4.25641	0.23494	3.02174	0.330935
gi|258508219|	YP_003170970.1	ABC transporter oligopeptide-binding protein	60385	9.98	LIPO(Sec/SPII)	0	Cellwall	Y	C	transmembrane transport [GO:0055085]		ATP-binding cassette (ABC) transporter complex [GO:0043190]	0	0	0	0	0	0	64	2	0.13	0	0	0	#DIV/0!	#DIV/0!	#DIV/0!	0	#DIV/0!	0	#DIV/0!	#DIV/0!
gi|258507196|	YP_003169947.1	ABC transporter oligopeptide-binding protein	59874	9.93	LIPO(Sec/SPII)	1	Cellwall	Y	C	transmembrane transport [GO:0055085]		ATP-binding cassette (ABC) transporter complex [GO:0043190]	0	0	0	0	0	0	1422	49	0.94	350	16	0.35	#DIV/0!	#DIV/0!	2.68571	0.37234	#DIV/0!	0	#DIV/0!	0
gi|258509061|	YP_003171812.1	ABC transporter oligopeptide-binding protein	59479	10.05	LIPO(Sec/SPII)	0	Cellwall	Y	C	transmembrane transport [GO:0055085]		ATP-binding cassette (ABC) transporter complex [GO:0043190]	37	3	0.13	35	1	0.06	2256	72	1.98	1710	56	1.34	2.16667	0.461538	1.47761	0.676768	15.2308	0.0656566	22.3333	0.0447761
gi|258507967|	YP_003170718.1	ABC transporter spermidine/putrescine-binding protein	40688	6.64	SP(Sec/SPI)	0	CytoplasmicMembrane	Y	C	polyamine transport [GO:0015846]	polyamine binding [GO:0019808]	periplasmic space [GO:0042597]	0	0	0	0	0	0	82	5	0.19	0	0	0	#DIV/0!	#DIV/0!	#DIV/0!	0	#DIV/0!	0	#DIV/0!	#DIV/0!
gi|258507684|	YP_003170435.1	ABC transporter substrate-binding protein	34553	10.5	LIPO(Sec/SPII)	1	CytoplasmicMembrane	Y	C				0	0	0	0	0	0	512	16	0.51	0	0	0	#DIV/0!	#DIV/0!	#DIV/0!	0	#DIV/0!	0	#DIV/0!	#DIV/0!
gi|258508191|	YP_003170942.1	ABC transporter substrate-binding protein, NLPA lipoprotein	30718	10.56	LIPO(Sec/SPII)	1	CytoplasmicMembrane	Y	C				0	0	0	0	0	0	467	12	0.59	118	4	0.26	#DIV/0!	#DIV/0!	2.26923	0.440678	#DIV/0!	0	#DIV/0!	0
gi|258508653|	YP_003171404.1	acyl carrier protein	9049	3.8	OTHER	0	Cytoplasmic	N	NM		acyl carrier activity [GO:0000036]	cytoplasm [GO:0005737]	0	0	0	0	0	0	54	2	0.45	0	0	0	#DIV/0!	#DIV/0!	#DIV/0!	0	#DIV/0!	0	#DIV/0!	#DIV/0!
gi|258509114|	YP_003171865.1	Acyl carrier protein	8957	3.6	OTHER	0	Cytoplasmic	N	NM		acyl carrier activity [GO:0000036]	cytoplasm [GO:0005737]	382	9	1.11	0	0	0	262	10	2.06	0	0	0	#DIV/0!	0	#DIV/0!	0	1.85586	0.538835	#DIV/0!	#DIV/0!
gi|258509049|	YP_003171800.1	acyltransferase	26559	9.96	OTHER	0	CytoplasmicMembrane	Y	NC		transferase activity, transferring acyl groups [GO:0016746]	integral component of membrane [GO:0016021]	51	4	0.49	101	4	0.49	458	19	0.95	347	12	0.49	1	1	1.93878	0.515789	1.93878	0.515789	1	1
gi|258509461|	YP_003172212.1	Adenylate kinase	23923	6.52	OTHER	0	Cytoplasmic	N	NM	AMP salvage [GO:0044209]	adenylate kinase activity [GO:0004017]; ATP binding [GO:0005524]; zinc ion binding [GO:0008270]	cytoplasm [GO:0005737]	111	6	0.34	0	0	0	0	0	0	0	0	0	#DIV/0!	0	#DIV/0!	#DIV/0!	0	#DIV/0!	#DIV/0!	#DIV/0!
gi|258507128|	YP_003169879.1	Adenylosuccinate synthetase	47335	6.03	OTHER	0	Cytoplasmic	N	NM	'de novo' AMP biosynthetic process [GO:0044208]	adenylosuccinate synthase activity [GO:0004019]; GTP binding [GO:0005525]; magnesium ion binding [GO:0000287]	cytoplasm [GO:0005737]	96	6	0.16	0	0	0	104	5	0.16	0	0	0	#DIV/0!	0	#DIV/0!	0	1	1	#DIV/0!	#DIV/0!
gi|258507762|	YP_003170513.1	alanyl-tRNA synthetase	97300	6.15	OTHER	0	Cytoplasmic	N	NM	alanyl-tRNA aminoacylation [GO:0006419]	alanine-tRNA ligase activity [GO:0004813]; ATP binding [GO:0005524]; metal ion binding [GO:0046872]; tRNA binding [GO:0000049]	cytoplasm [GO:0005737]	0	0	0	0	0	0	61	2	0.08	0	0	0	#DIV/0!	#DIV/0!	#DIV/0!	0	#DIV/0!	0	#DIV/0!	#DIV/0!
gi|258509828|	YP_003172579.1	aldo/keto reductase	34094	5.22	OTHER	1	Cytoplasmic	N	NM		oxidoreductase activity [GO:0016491]		0	0	0	0	0	0	126	5	0.23	0	0	0	#DIV/0!	#DIV/0!	#DIV/0!	0	#DIV/0!	0	#DIV/0!	#DIV/0!
gi|258507739|	YP_003170490.1	aldo/keto reductase	30878	6.44	OTHER	1	Cytoplasmic	N	NM		oxidoreductase activity [GO:0016491]		53	2	0.12	0	0	0	163	8	0.26	0	0	0	#DIV/0!	0	#DIV/0!	0	2.16667	0.461538	#DIV/0!	#DIV/0!
gi|258507314|	YP_003170065.1	Alpha/beta hydrolase superfamily protein	33103	9.69	SP(Sec/SPI)	0	CytoplasmicMembrane	Y	C		hydrolase activity [GO:0016787]; transferase activity, transferring acyl groups [GO:0016746]		0	0	0	0	0	0	59	2	0.24	40	1	0.11	#DIV/0!	#DIV/0!	2.18182	0.458333	#DIV/0!	0	#DIV/0!	0
gi|258508351|	YP_003171102.1	Amino acid ABC transporter permease	52765	10.01	SP(Sec/SPI)	0	CytoplasmicMembrane	Y	C	nitrogen compound transport [GO:0071705]	transmembrane transporter activity [GO:0022857]	ATP-binding cassette (ABC) transporter complex [GO:0043190]	83	4	0.15	43	1	0.07	145	6	0.15	46	1	0.07	2.14286	0.466667	2.14286	0.466667	1	1	1	1
gi|258509811|	YP_003172562.1	Amino acid ABC transporter permease	52324	10.22	SP(Sec/SPI)	0	CytoplasmicMembrane	Y	C	nitrogen compound transport [GO:0071705]	transmembrane transporter activity [GO:0022857]	ATP-binding cassette (ABC) transporter complex [GO:0043190]	95	6	0.23	110	6	0.32	160	6	0.23	99	5	0.15	0.71875	1.3913	1.53333	0.652174	1	1	0.46875	2.13333
gi|258509341|	YP_003172092.1	aminopeptidase C	50737	4.96	OTHER	0	Cytoplasmic	Y	NC		aminopeptidase activity [GO:0004177]; cysteine-type endopeptidase activity [GO:0004197]		904	37	1.18	138	7	0.24	863	41	1.18	136	6	0.24	4.91667	0.20339	4.91667	0.20339	1	1	1	1
gi|258507549|	YP_003170300.1	aminopeptidase N	94487	4.81	OTHER	0	Cytoplasmic	N	NM		aminopeptidase activity [GO:0004177]; metallopeptidase activity [GO:0008237]; zinc ion binding [GO:0008270]		0	0	0	0	0	0	77	3	0.04	0	0	0	#DIV/0!	#DIV/0!	#DIV/0!	0	#DIV/0!	0	#DIV/0!	#DIV/0!
gi|258508781|	YP_003171532.1	arginyl-tRNA synthetase	62482	6.08	OTHER	0	Cytoplasmic	N	NM	arginyl-tRNA aminoacylation [GO:0006420]	arginine-tRNA ligase activity [GO:0004814]; ATP binding [GO:0005524]	cytoplasm [GO:0005737]	47	2	0.12	0	0	0	0	0	0	0	0	0	#DIV/0!	0	#DIV/0!	#DIV/0!	0	#DIV/0!	#DIV/0!	#DIV/0!
gi|258508486|	YP_003171237.1	Asparaginyl-tRNA synthetase	50188	5.03	OTHER	1	Cytoplasmic	N	NM	asparaginyl-tRNA aminoacylation [GO:0006421]	asparagine-tRNA ligase activity [GO:0004816]; ATP binding [GO:0005524]; nucleic acid binding [GO:0003676]	cytoplasm [GO:0005737]	197	6	0.15	0	0	0	169	4	0.15	0	0	0	#DIV/0!	0	#DIV/0!	0	1	1	#DIV/0!	#DIV/0!
gi|258508015|	YP_003170766.1	aspartyl/glutamyl-tRNA amidotransferase subunit B	53383	5.38	OTHER	0	Cytoplasmic	Y	NC	translation [GO:0006412]	ATP binding [GO:0005524]; glutaminyl-tRNA synthase (glutamine-hydrolyzing) activity [GO:0050567]; transferase activity [GO:0016740]		0	0	0	0	0	0	57	3	0.14	0	0	0	#DIV/0!	#DIV/0!	#DIV/0!	0	#DIV/0!	0	#DIV/0!	#DIV/0!
gi|258508556|	YP_003171307.1	aspartyl-tRNA synthetase	67822	4.9	OTHER	2	Cytoplasmic	N	NM	aspartyl-tRNA aminoacylation [GO:0006422]	aspartate-tRNA ligase activity [GO:0004815]; ATP binding [GO:0005524]; nucleic acid binding [GO:0003676]	cytoplasm [GO:0005737]	75	7	0.11	0	0	0	68	5	0.05	0	0	0	#DIV/0!	0	#DIV/0!	0	0.454545	2.2	#DIV/0!	#DIV/0!
gi|258508362|	YP_003171113.1	ATP-dependent chaperone ClpB	96322	5.19	OTHER	0	Cytoplasmic	N	NM	protein metabolic process [GO:0019538]; protein refolding [GO:0042026]; response to heat [GO:0009408]	ATP binding [GO:0005524]	cytoplasm [GO:0005737]	0	0	0	48	3	0.04	0	0	0	37	5	0.04	0	#DIV/0!	0	#DIV/0!	#DIV/0!	#DIV/0!	1	1
gi|258509494|	YP_003172245.1	ATP-dependent Clp protease ATP-binding subunit	91642	6.44	OTHER	0	Cytoplasmic	N	NM		ATP binding [GO:0005524]; peptidase activity [GO:0008233]		0	0	0	0	0	0	106	5	0.08	0	0	0	#DIV/0!	#DIV/0!	#DIV/0!	0	#DIV/0!	0	#DIV/0!	#DIV/0!
gi|258508818|	YP_003171569.1	ATP-dependent clp protease ATP-binding subunit	81782	5.78	OTHER	0	Cytoplasmic	N	NM		ATP binding [GO:0005524]; peptidase activity [GO:0008233]		0	0	0	0	0	0	91	5	0.09	0	0	0	#DIV/0!	#DIV/0!	#DIV/0!	0	#DIV/0!	0	#DIV/0!	#DIV/0!
gi|258509030|	YP_003171781.1	ATP-dependent Clp protease ATP-binding subunit	78381	5.44	OTHER	0	Cytoplasmic	N	NM		ATP binding [GO:0005524]; peptidase activity [GO:0008233]		0	0	0	0	0	0	605	30	0.66	0	0	0	#DIV/0!	#DIV/0!	#DIV/0!	0	#DIV/0!	0	#DIV/0!	#DIV/0!
gi|258507926|	YP_003170677.1	ATP-dependent Clp protease proteolytic subunit -ClpP	21482	4.86	OTHER	0	Cytoplasmic	N	NM		serine-type endopeptidase activity [GO:0004252]	cytoplasm [GO:0005737]	259	9	0.39	145	4	0.18	376	11	0.39	211	5	0.18	2.16667	0.461538	2.16667	0.461538	1	1	1	1
gi|258508854|	YP_003171605.1	beta-lactamase class C-like penicillin binding protein	44131	10.3	OTHER	0	CytoplasmicMembrane	N	NM		hydrolase activity [GO:0016787]	integral component of membrane [GO:0016021]	0	0	0	0	0	0	70	2	0.08	0	0	0	#DIV/0!	#DIV/0!	#DIV/0!	0	#DIV/0!	0	#DIV/0!	#DIV/0!
gi|258507429|	YP_003170180.1	beta-N-acetylhexosaminidase (GH3)	64699	5.24	OTHER	1	Cellwall	Y	NC	carbohydrate metabolic process [GO:0005975]	hydrolase activity, hydrolyzing O-glycosyl compounds [GO:0004553]	integral component of membrane [GO:0016021]	64	4	0.12	0	0	0	233	14	0.32	0	0	0	#DIV/0!	0	#DIV/0!	0	2.66667	0.375	#DIV/0!	#DIV/0!
gi|258508456|	YP_003171207.1	bifunctional pyrimidine regulatory protein PyrR/uracil phosphoribosyltransferase	20458	6.25	OTHER	0	Cytoplasmic	N	NM	DNA-templated transcription, termination [GO:0006353]; nucleoside metabolic process [GO:0009116]	RNA binding [GO:0003723]; uracil phosphoribosyltransferase activity [GO:0004845]		0	0	0	0	0	0	107	5	0.19	0	0	0	#DIV/0!	#DIV/0!	#DIV/0!	0	#DIV/0!	0	#DIV/0!	#DIV/0!
gi|258509048|	YP_003171799.1	capsular polysaccharide biosynthesis chain length regulator	34112	9.9	SP(Sec/SPI)	0	CytoplasmicMembrane	Y	C	lipopolysaccharide biosynthetic process [GO:0009103]		integral component of membrane [GO:0016021]	66	3	0.11	0	0	0	0	0	0	0	0	0	#DIV/0!	0	#DIV/0!	#DIV/0!	0	#DIV/0!	#DIV/0!	#DIV/0!
gi|258509509|	YP_003172260.1	cell division protein FtsH	78189	5.13	OTHER	0	CytoplasmicMembrane	Y	NC	cell division [GO:0051301]; protein catabolic process [GO:0030163]	ATPase activity [GO:0016887]; ATP binding [GO:0005524]; metalloendopeptidase activity [GO:0004222]; zinc ion binding [GO:0008270]	integral component of membrane [GO:0016021]; plasma membrane [GO:0005886]	57	2	0.05	0	0	0	0	0	0	0	0	0	#DIV/0!	0	#DIV/0!	#DIV/0!	0	#DIV/0!	#DIV/0!	#DIV/0!
gi|258508275|	YP_003171026.1	Cell division protein FtsI	76741	10.16	OTHER	0	CytoplasmicMembrane	Y	NC		penicillin binding [GO:0008658]	integral component of membrane [GO:0016021]	0	0	0	0	0	0	1050	41	0.85	76	3	0.15	#DIV/0!	#DIV/0!	5.66667	0.176471	#DIV/0!	0	#DIV/0!	0
gi|258508701|	YP_003171452.1	Cell division protein/penicillin-binding protein 2	77383	9.56	OTHER	5	CytoplasmicMembrane	Y	NC	cell division [GO:0051301]	penicillin binding [GO:0008658]		0	0	0	0	0	0	379	14	0.32	104	6	0.15	#DIV/0!	#DIV/0!	2.13333	0.46875	#DIV/0!	0	#DIV/0!	0
gi|258509729|	YP_003172480.1	cell envelope-associated proteinase, lactocepin PrtR	155672	4.81	SP(Sec/SPI)	1	Cellwall	Y	C		serine-type endopeptidase activity [GO:0004252]	cell wall [GO:0005618]; integral component of membrane [GO:0016021]	2011	60	0.49	1004	33	0.29	3407	84	0.67	2358	66	0.52	1.68966	0.591837	1.28846	0.776119	1.36735	0.731343	1.7931	0.557692
gi|258509032|	YP_003171783.1	Cell envelope-related transcriptional attenuator	32666	9.48	OTHER	0	CytoplasmicMembrane	Y	NC				146	15	0.55	113	7	0.24	1695	43	2.33	835	20	0.73	2.29167	0.436364	3.19178	0.313305	4.23636	0.236052	3.04167	0.328767
gi|258507178|	YP_003169929.1	cell surface protein	28466	5.36	SP(Sec/SPI)	0	Unknown	Y	C				0	0	0	33	2	0.13	0	0	0	0	0	0	0	#DIV/0!	#DIV/0!	#DIV/0!	#DIV/0!	#DIV/0!	0	#DIV/0!
gi|258507319|	YP_003170070.1	cell wall-associated glycoside hydrolase (NLP/P60 protein)	49766	6.95	SP(Sec/SPI)	1	Extracellular	Y	C		hydrolase activity [GO:0016787]		845	21	0.44	712	22	0.44	878	25	0.66	740	22	0.54	1	1	1.22222	0.818182	1.5	0.666667	1.22727	0.814815
gi|258509234|	YP_003171985.1	Chaperonin GroEL	57357	4.67	OTHER	1	Cytoplasmic	N	NM	protein refolding [GO:0042026]	ATP binding [GO:0005524]; unfolded protein binding [GO:0051082]	cytoplasm [GO:0005737]	7905	133	5.59	2080	40	1.41	8471	152	8.62	1726	30	1	3.96454	0.252236	8.62	0.116009	1.54204	0.648492	0.70922	1.41
gi|258509235|	YP_003171986.1	co-chaperonin GroES	10033	4.65	OTHER	0	Cytoplasmic	N	NM	protein folding [GO:0006457]	ATP binding [GO:0005524]	cytoplasm [GO:0005737]	521	13	1.76	296	8	0.97	492	14	2.87	246	5	0.97	1.81443	0.551136	2.95876	0.337979	1.63068	0.61324	1	1
gi|258507603|	YP_003170354.1	cold shock protein	7198	4.38	OTHER	0	Cytoplasmic	Y	NC		nucleic acid binding [GO:0003676]	cytoplasm [GO:0005737]	169	8	0.58	55	2	0.58	138	7	0.58	67	2	0.58	1	1	1	1	1	1	1	1
gi|258509199|	YP_003171950.1	CRISPR-associated protein Csn1	156557	9.54	OTHER	0	Unknown	N	NM	defense response to virus [GO:0051607]; maintenance of CRISPR repeat elements [GO:0043571]	DNA binding [GO:0003677]; endonuclease activity [GO:0004519]; metal ion binding [GO:0046872]; RNA binding [GO:0003723]		35	3	0.02	0	0	0	0	0	0	0	0	0	#DIV/0!	0	#DIV/0!	#DIV/0!	0	#DIV/0!	#DIV/0!	#DIV/0!
gi|258508067|	YP_003170818.1	CspA family cold shock protein	7364	4.25	OTHER	0	Cytoplasmic	Y	NC		nucleic acid binding [GO:0003676]	cytoplasm [GO:0005737]	350	17	1.46	102	7	1.46	457	14	5.03	178	8	1.46	1	1	3.44521	0.290258	3.44521	0.290258	1	1
gi|258507563|	YP_003170314.1	Cysteine synthase	32586	5.05	OTHER	0	Cytoplasmic	N	NM	cysteine biosynthetic process from serine [GO:0006535]	cysteine synthase activity [GO:0004124]		61	3	0.24	0	0	0	128	8	0.39	0	0	0	#DIV/0!	0	#DIV/0!	0	1.625	0.615385	#DIV/0!	#DIV/0!
gi|258507143|	YP_003169894.1	D-alanine--D-alanine ligase	39294	5.09	OTHER	0	Cytoplasmic	N	NM	cell wall organization [GO:0071555]; peptidoglycan biosynthetic process [GO:0009252]; regulation of cell shape [GO:0008360]	ATP binding [GO:0005524]; D-alanine-D-alanine ligase activity [GO:0008716]; metal ion binding [GO:0046872]	cytoplasm [GO:0005737]	0	0	0	0	0	0	119	2	0.1	0	0	0	#DIV/0!	#DIV/0!	#DIV/0!	0	#DIV/0!	0	#DIV/0!	#DIV/0!
gi|258507249|	YP_003170000.1	D-alanyl-D-alanine carboxypeptidase	47015	10.18	SP(Sec/SPI)	0	CytoplasmicMembrane	Y	C		serine-type D-Ala-D-Ala carboxypeptidase activity [GO:0009002]		619	16	0.47	594	13	0.84	922	17	0.47	714	18	0.71	0.559524	1.78723	0.661972	1.51064	1	1	0.845238	1.1831
gi|258507503|	YP_003170254.1	Dihydroxyacetone kinase	20636	6.82	OTHER	0	Cytoplasmic	N	NM	glycerol metabolic process [GO:0006071]	glycerone kinase activity [GO:0004371]		68	5	0.19	0	0	0	492	18	0.98	0	0	0	#DIV/0!	0	#DIV/0!	0	5.15789	0.193878	#DIV/0!	#DIV/0!
gi|258508153|	YP_003170904.1	dipeptidase A	54322	4.74	OTHER	0	Cytoplasmic	N	NM		dipeptidase activity [GO:0016805]		61	2	0.07	0	0	0	51	2	0.07	0	0	0	#DIV/0!	0	#DIV/0!	0	1	1	#DIV/0!	#DIV/0!
gi|258507153|	YP_003169904.1	D-lactate dehydrogenase	37036	5.58	OTHER	0	Cytoplasmic	N	NM		NAD binding [GO:0051287]; oxidoreductase activity, acting on the CH-OH group of donors, NAD or NADP as acceptor [GO:0016616]		159	6	0.34	0	0	0	132	6	0.47	0	0	0	#DIV/0!	0	#DIV/0!	0	1.38235	0.723404	#DIV/0!	#DIV/0!
gi|258508386|	YP_003171137.1	DNA-binding protein HU	9506	10.65	OTHER	0	Cytoplasmic	N	NM	chromosome condensation [GO:0030261]	DNA binding [GO:0003677]		740	21	3.11	461	14	3.11	733	18	3.11	783	20	1.88	1	1	1.65426	0.604502	1	1	0.604502	1.65426
gi|258509456|	YP_003172207.1	DNA-directed RNA polymerase subunit alpha	34837	4.75	OTHER	2	Cytoplasmic	N	NM	transcription, DNA-templated [GO:0006351]	DNA binding [GO:0003677]; DNA-directed 5'-3' RNA polymerase activity [GO:0003899]; protein dimerization activity [GO:0046983]		302	12	0.51	0	0	0	530	18	0.51	68	2	0.23	#DIV/0!	0	2.21739	0.45098	1	1	#DIV/0!	0
gi|258509493|	YP_003172244.1	DNA-directed RNA polymerase subunit beta	133938	4.97	OTHER	0	Cytoplasmic	N	NM	transcription, DNA-templated [GO:0006351]	DNA binding [GO:0003677]; DNA-directed 5'-3' RNA polymerase activity [GO:0003899]; ribonucleoside binding [GO:0032549]		279	13	0.18	0	0	0	339	17	0.15	0	0	0	#DIV/0!	0	#DIV/0!	0	0.833333	1.2	#DIV/0!	#DIV/0!
gi|258509492|	YP_003172243.1	DNA-directed RNA polymerase subunit beta'	137049	6.46	OTHER	0	Cytoplasmic	N	NM	transcription, DNA-templated [GO:0006351]	DNA binding [GO:0003677]; DNA-directed 5'-3' RNA polymerase activity [GO:0003899]		307	21	0.3	0	0	0	265	15	0.17	0	0	0	#DIV/0!	0	#DIV/0!	0	0.566667	1.76471	#DIV/0!	#DIV/0!
gi|258508993|	YP_003171744.1	dTDP-4-dehydrorhamnose 3,5-epimerase	21552	5.28	OTHER	0	Unknown	N	NM	dTDP-rhamnose biosynthetic process [GO:0019305]	dTDP-4-dehydrorhamnose 3,5-epimerase activity [GO:0008830]		204	7	0.39	0	0	0	596	22	0.63	0	0	0	#DIV/0!	0	#DIV/0!	0	1.61538	0.619048	#DIV/0!	#DIV/0!
gi|258508991|	YP_003171742.1	dTDP-4-dehydrorhamnose reductase	31970	5.2	OTHER	0	Unknown	Y	NC	dTDP-rhamnose biosynthetic process [GO:0019305]	dTDP-4-dehydrorhamnose reductase activity [GO:0008831]		66	2	0.12	0	0	0	344	11	0.4	0	0	0	#DIV/0!	0	#DIV/0!	0	3.33333	0.3	#DIV/0!	#DIV/0!
gi|258508992|	YP_003171743.1	dTDP-glucose 4,6-dehydratase	38560	6.45	OTHER	0	Cytoplasmic	Y	NC	nucleotide-sugar metabolic process [GO:0009225]	dTDP-glucose 4,6-dehydratase activity [GO:0008460]		79	7	0.2	0	0	0	79	6	0.2	44	2	0.1	#DIV/0!	0	2	0.5	1	1	#DIV/0!	0
gi|258509488|	YP_003172239.1	Elongation factor G	76888	4.5	OTHER	0	Cytoplasmic	N	NM		GTPase activity [GO:0003924]; GTP binding [GO:0005525]; translation elongation factor activity [GO:0003746]	cytoplasm [GO:0005737]	1635	49	0.84	89	4	0.1	1460	50	1.03	122	3	0.15	8.4	0.119048	6.86667	0.145631	1.22619	0.815534	1.5	0.666667
gi|258508622|	YP_003171373.1	Elongation factor Ts	31557	4.72	OTHER	0	Cytoplasmic	N	NM		translation elongation factor activity [GO:0003746]	cytoplasm [GO:0005737]	509	19	1.21	139	3	0.25	392	17	1.77	179	4	0.12	4.84	0.206612	14.75	0.0677966	1.46281	0.683616	0.48	2.08333
gi|258508337|	YP_003171088.1	Elongation factor Tu	43532	4.56	OTHER	0	Cytoplasmic	N	NM		GTPase activity [GO:0003924]; GTP binding [GO:0005525]; translation elongation factor activity [GO:0003746]	cytoplasm [GO:0005737]	3857	99	4.66	1493	39	1.69	3784	96	4.21	1743	46	2.18	2.7574	0.362661	1.93119	0.517815	0.903433	1.10689	1.28994	0.775229
gi|258509269|	YP_003172020.1	Endopeptidase lactocepin (prtP)	206509	5.12	SP(Sec/SPI)	0	Cellwall	Y	C		serine-type endopeptidase activity [GO:0004252]	cell wall [GO:0005618]; extracellular region [GO:0005576]; integral component of membrane [GO:0016021]	35	2	0.02	0	0	0	219	11	0.09	79	2	0.02	#DIV/0!	0	4.5	0.222222	4.5	0.222222	#DIV/0!	0
gi|258507931|	YP_003170682.1	Enolase, phosphopyruvate hydratase	47098	4.39	OTHER	0	Cytoplasmic	N	NM	glycolytic process [GO:0006096]	magnesium ion binding [GO:0000287]; phosphopyruvate hydratase activity [GO:0004634]	cell surface [GO:0009986]; extracellular region [GO:0005576]; phosphopyruvate hydratase complex [GO:0000015]	4983	110	5.76	2056	44	2.15	5036	104	6.3	1975	47	1.7	2.67907	0.373264	3.70588	0.269841	1.09375	0.914286	0.790698	1.26471
gi|258509519|	YP_003172270.1	ErfK/YbiS/YcfS/YnhG family protein	50215	9.1	OTHER	0	Unknown	Y	NC		transferase activity [GO:0016740]	integral component of membrane [GO:0016021]	0	0	0	264	7	0.24	60	4	0.14	0	0	0	0	#DIV/0!	#DIV/0!	0	#DIV/0!	0	0	#DIV/0!
gi|258509524|	YP_003172275.1	ErfK/YbiS/YcfS/YnhG family protein	26318	9.69	OTHER	0	Unknown	Y	NC		transferase activity [GO:0016740]		72	5	0.14	0	0	0	308	6	0.24	336	8	0.43	#DIV/0!	0	0.55814	1.79167	1.71429	0.583333	#DIV/0!	0
gi|258507672|	YP_003170423.1	esterase/lipase	28367	4.91	OTHER	0	Unknown	N	NM		hydrolase activity [GO:0016787]		0	0	0	0	0	0	121	9	0.28	0	0	0	#DIV/0!	#DIV/0!	#DIV/0!	0	#DIV/0!	0	#DIV/0!	#DIV/0!
gi|258508860|	YP_003171611.1	extracellular matrix binding protein	252580	5.12	SP(Sec/SPI)	0	Cellwall	Y	C			integral component of membrane [GO:0016021]	796	25	0.12	700	21	0.11	1053	28	0.11	994	27	0.09	1.09091	0.916667	1.22222	0.818182	0.916667	1.09091	0.818182	1.22222
gi|258507775|	YP_003170526.1	Extramembranal protein DltD	47974	10.05	SP(Sec/SPI)	0	CytoplasmicMembrane	Y	C	lipoteichoic acid biosynthetic process [GO:0070395]		integral component of membrane [GO:0016021]; plasma membrane [GO:0005886]	0	0	0	0	0	0	945	25	0.57	66	5	0.08	#DIV/0!	#DIV/0!	7.125	0.140351	#DIV/0!	0	#DIV/0!	0
gi|258508176|	YP_003170927.1	F0F1 ATP synthase subunit alpha	55253	4.99	OTHER	0	Cytoplasmic	N	NM	ATP synthesis coupled proton transport [GO:0015986]	ATP binding [GO:0005524]; proton-transporting ATP synthase activity, rotational mechanism [GO:0046933]	plasma membrane [GO:0005886]; proton-transporting ATP synthase complex, catalytic core F(1) [GO:0045261]	652	27	0.8	0	0	0	642	23	0.58	0	0	0	#DIV/0!	0	#DIV/0!	0	0.725	1.37931	#DIV/0!	#DIV/0!
gi|258508179|	YP_003170930.1	F0F1 ATP synthase subunit beta	53109	4.29	OTHER	0	CytoplasmicMembrane	N	NM	ATP synthesis coupled proton transport [GO:0015986]	ATP binding [GO:0005524]; proton-transporting ATP synthase activity, rotational mechanism [GO:0046933]	plasma membrane [GO:0005886]; proton-transporting ATP synthase complex, catalytic core F(1) [GO:0045261]	1147	31	0.97	35	1	0.07	1367	35	0.84	42	3	0.15	13.8571	0.0721649	5.6	0.178571	0.865979	1.15476	2.14286	0.466667
gi|258507519|	YP_003170270.1	Fructose-bisphosphate aldolase	31686	4.79	OTHER	0	Cytoplasmic	N	NM	fructose 1,6-bisphosphate metabolic process [GO:0030388]; glycolytic process [GO:0006096]	fructose-bisphosphate aldolase activity [GO:0004332]; zinc ion binding [GO:0008270]		136	9	0.76	0	0	0	537	25	1.2	77	3	0.25	#DIV/0!	0	4.8	0.208333	1.57895	0.633333	#DIV/0!	0
gi|258508412|	YP_003171163.1	galactose mutarotase	32669	6.44	OTHER	1	Unknown	N	NM	carbohydrate metabolic process [GO:0005975]	carbohydrate binding [GO:0030246]; isomerase activity [GO:0016853]		0	0	0	0	0	0	31	2	0.12	0	0	0	#DIV/0!	#DIV/0!	#DIV/0!	0	#DIV/0!	0	#DIV/0!	#DIV/0!
gi|258509572|	YP_003172323.1	galactose mutarotase	32587	4.9	OTHER	0	Unknown	Y	NC	carbohydrate metabolic process [GO:0005975]	carbohydrate binding [GO:0030246]; isomerase activity [GO:0016853]		0	0	0	0	0	0	37	2	0.12	0	0	0	#DIV/0!	#DIV/0!	#DIV/0!	0	#DIV/0!	0	#DIV/0!	#DIV/0!
gi|258509908|	YP_003172659.1	glucosamine-6-phosphate deaminase	26067	5.34	OTHER	0	Unknown	Y	NC	carbohydrate metabolic process [GO:0005975]; N-acetylglucosamine metabolic process [GO:0006044]; N-acetylneuraminate catabolic process [GO:0019262]	glucosamine-6-phosphate deaminase activity [GO:0004342]		0	0	0	0	0	0	78	5	0.5	0	0	0	#DIV/0!	#DIV/0!	#DIV/0!	0	#DIV/0!	0	#DIV/0!	#DIV/0!
gi|258507978|	YP_003170729.1	glucosamine--fructose-6-phosphate aminotransferase	65788	5.2	OTHER	0	Cytoplasmic	N	NM	carbohydrate derivative biosynthetic process [GO:1901137]; carbohydrate metabolic process [GO:0005975]	carbohydrate derivative binding [GO:0097367]; glutamine-fructose-6-phosphate transaminase (isomerizing) activity [GO:0004360]	cytoplasm [GO:0005737]	124	9	0.25	0	0	0	182	9	0.25	0	0	0	#DIV/0!	0	#DIV/0!	0	1	1	#DIV/0!	#DIV/0!
gi|258508994|	YP_003171745.1	glucose-1-phosphate thymidylyltransferase	32535	5.07	OTHER	0	Cytoplasmic	N	NM	extracellular polysaccharide biosynthetic process [GO:0045226]	glucose-1-phosphate thymidylyltransferase activity [GO:0008879]; metal ion binding [GO:0046872]		40	4	0.12	0	0	0	93	5	0.12	0	0	0	#DIV/0!	0	#DIV/0!	0	1	1	#DIV/0!	#DIV/0!
gi|258508080|	YP_003170831.1	glucose-6-phosphate isomerase	49348	4.73	OTHER	0	Cytoplasmic	N	NM	gluconeogenesis [GO:0006094]; glycolytic process [GO:0006096]	glucose-6-phosphate isomerase activity [GO:0004347]	cytoplasm [GO:0005737]	1460	47	1.07	59	4	0.34	1740	51	1.23	192	9	0.34	3.14706	0.317757	3.61765	0.276423	1.14953	0.869919	1	1
gi|258509856|	YP_003172607.1	glutamine ABC transporter ATP-binding protein	26823	5.15	OTHER	0	CytoplasmicMembrane	N	NM		amino acid-transporting ATPase activity [GO:0015424]; ATP binding [GO:0005524]		39	2	0.14	0	0	0	0	0	0	0	0	0	#DIV/0!	0	#DIV/0!	#DIV/0!	0	#DIV/0!	#DIV/0!	#DIV/0!
gi|258508691|	YP_003171442.1	Glutamine synthetase	50512	5.73	OTHER	1	Cytoplasmic	N	NM	glutamine biosynthetic process [GO:0006542]	ATP binding [GO:0005524]; glutamate-ammonia ligase activity [GO:0004356]		348	16	0.53	0	0	0	338	12	0.33	0	0	0	#DIV/0!	0	#DIV/0!	0	0.622642	1.60606	#DIV/0!	#DIV/0!
gi|258509327|	YP_003172078.1	Glutamyl-tRNA synthetase	56901	6.09	OTHER	1	Cytoplasmic	N	NM	glutamyl-tRNA aminoacylation [GO:0006424]	ATP binding [GO:0005524]; glutamate-tRNA ligase activity [GO:0004818]; tRNA binding [GO:0000049]; zinc ion binding [GO:0008270]	cytoplasm [GO:0005737]	130	9	0.21	0	0	0	58	5	0.14	0	0	0	#DIV/0!	0	#DIV/0!	0	0.666667	1.5	#DIV/0!	#DIV/0!
gi|258507928|	YP_003170679.1	glyceraldehyde-3-phosphate dehydrogenase	36929	5.63	OTHER	0	Cytoplasmic	Y	NC	glucose metabolic process [GO:0006006]	glyceraldehyde-3-phosphate dehydrogenase (NAD+) (phosphorylating) activity [GO:0004365]; NAD binding [GO:0051287]; NADP binding [GO:0050661]		1857	34	1.17	741	14	0.47	2019	43	1.17	466	11	0.34	2.48936	0.401709	3.44118	0.290598	1	1	0.723404	1.38235
gi|258508188|	YP_003170939.1	Glycine cleavage system protein H	10787	4.18	OTHER	0	Unknown	N	NM	glycine decarboxylation via glycine cleavage system [GO:0019464]		glycine cleavage complex [GO:0005960]	502	9	0.88	143	3	0.37	553	12	2.54	157	4	0.37	2.37838	0.420455	6.86486	0.145669	2.88636	0.346457	1	1
gi|258507071|	YP_003169822.1	glycine/betaine ABC transporter substrate-binding protein	34862	9.79	LIPO(Sec/SPII)	1	CytoplasmicMembrane	Y	C		transmembrane transporter activity [GO:0022857]	ATP-binding cassette (ABC) transporter complex [GO:0043190]	0	0	0	0	0	0	455	13	0.51	0	0	0	#DIV/0!	#DIV/0!	#DIV/0!	0	#DIV/0!	0	#DIV/0!	#DIV/0!
gi|258509141|	YP_003171892.1	glycine/betaine ABC transporter substrate-binding protein	32897	10.1	LIPO(Sec/SPII)	0	Cellwall	Y	C		transmembrane transporter activity [GO:0022857]	ATP-binding cassette (ABC) transporter complex [GO:0043190]	0	0	0	0	0	0	39	3	0.11	0	0	0	#DIV/0!	#DIV/0!	#DIV/0!	0	#DIV/0!	0	#DIV/0!	#DIV/0!
gi|258508963|	YP_003171714.1	GMP synthase	57830	5.29	OTHER	0	Cytoplasmic	N	NM	glutamine metabolic process [GO:0006541]	ATP binding [GO:0005524]; GMP synthase (glutamine-hydrolyzing) activity [GO:0003922]; pyrophosphatase activity [GO:0016462]		93	4	0.13	0	0	0	0	0	0	0	0	0	#DIV/0!	0	#DIV/0!	#DIV/0!	0	#DIV/0!	#DIV/0!	#DIV/0!
gi|258507242|	YP_003169993.1	GTP-dependent nucleic acid-binding protein EngD	40281	4.6	OTHER	0	Cytoplasmic	N	NM		ATPase activity [GO:0016887]; ATP binding [GO:0005524]; GTP binding [GO:0005525]; ribosomal large subunit binding [GO:0043023]; ribosome binding [GO:0043022]		49	3	0.31	0	0	0	232	9	0.31	0	0	0	#DIV/0!	0	#DIV/0!	0	1	1	#DIV/0!	#DIV/0!
gi|258509799|	YP_003172550.1	Hsp20 family small heat shock protein	16633	4.62	OTHER	0	Cellwall	Y	NC				62	3	0.52	0	0	0	172	4	0.52	0	0	0	#DIV/0!	0	#DIV/0!	0	1	1	#DIV/0!	#DIV/0!
gi|258508600|	YP_003171351.1	HSP-70 Cofactor HSP20	21822	5.42	OTHER	0	Cytoplasmic	Y	NC	protein folding [GO:0006457]	adenyl-nucleotide exchange factor activity [GO:0000774]; chaperone binding [GO:0051087]; protein homodimerization activity [GO:0042803]	cytoplasm [GO:0005737]	32	4	0.18	0	0	0	47	4	0.18	0	0	0	#DIV/0!	0	#DIV/0!	0	1	1	#DIV/0!	#DIV/0!
gi|258507004|	YP_003169755.1	hypothetical protein LGG_00009	7831	5.56	OTHER	0	Unknown	Y	NC				62	4	0.52	95	6	0.52	136	5	0.52	151	7	0.52	1	1	1	1	1	1	1	1
gi|258507101|	YP_003169852.1	hypothetical protein LGG_00106	25474	10.83	SP(Sec/SPI)	0	CytoplasmicMembrane	Y	C				36	4	0.32	47	3	0.32	64	6	0.32	101	7	0.32	1	1	1	1	1	1	1	1
gi|258507111|	YP_003169862.1	hypothetical protein LGG_00116	13682	10.9	SP(Sec/SPI)	0	CytoplasmicMembrane	Y	C				0	0	0	35	2	0.29	0	0	0	0	0	0	0	#DIV/0!	#DIV/0!	#DIV/0!	#DIV/0!	#DIV/0!	0	#DIV/0!
gi|258507213|	YP_003169964.1	Hypothetical protein LGG_00218	7836	6.68	OTHER	0	Unknown	N	NM				48	2	0.52	0	0	0	100	10	2.53	0	0	0	#DIV/0!	0	#DIV/0!	0	4.86538	0.205534	#DIV/0!	#DIV/0!
gi|258507288|	YP_003170039.1	Hypothetical protein LGG_00293	23257	4.72	OTHER	0	Unknown	Y	NC		hydrolase activity [GO:0016787]		207	4	0.16	100	3	0.16	235	5	0.16	402	11	0.35	1	1	0.457143	2.1875	1	1	2.1875	0.457143
gi|258507569|	YP_003170320.1	Hypothetical protein LGG_00574	32596	4.65	SP(Sec/SPI)	0	Unknown	Y	C				253	6	0.24	139	4	0.55	47	3	0.12	104	4	0.39	0.436364	2.29167	0.307692	3.25	0.5	2	0.709091	1.41026
gi|258507582|	YP_003170333.1	hypothetical protein LGG_00587	72910	6.71	SP(Sec/SPI)	0	Unknown	Y	C				0	0	0	128	4	0.1	0	0	0	123	6	0.1	0	#DIV/0!	0	#DIV/0!	#DIV/0!	#DIV/0!	1	1
gi|258507668|	YP_003170419.1	Hypothetical protein LGG_00673	5469	5.88	OTHER	0	Cytoplasmic	Y	NC				494	15	4.78	218	4	0.79	621	18	4.78	264	5	0.79	6.05063	0.165272	6.05063	0.165272	1	1	1	1
gi|258507716|	YP_003170467.1	hypothetical protein LGG_00721	33691	10.03	OTHER	0	Unknown	Y	NC			integral component of membrane [GO:0016021]	0	0	0	0	0	0	358	15	0.37	0	0	0	#DIV/0!	#DIV/0!	#DIV/0!	0	#DIV/0!	0	#DIV/0!	#DIV/0!
gi|258507764|	YP_003170515.1	hypothetical protein LGG_00769	10115	5.13	OTHER	1	Cytoplasmic	N	NM				0	0	0	0	0	0	90	5	0.4	0	0	0	#DIV/0!	#DIV/0!	#DIV/0!	0	#DIV/0!	0	#DIV/0!	#DIV/0!
gi|258507785|	YP_003170536.1	hypothetical protein LGG_00790	17876	4.13	SP(Sec/SPI)	0	Unknown	Y	C				0	0	0	0	0	0	183	8	0.8	0	0	0	#DIV/0!	#DIV/0!	#DIV/0!	0	#DIV/0!	0	#DIV/0!	#DIV/0!
gi|258507981|	YP_003170732.1	Hypothetical protein LGG_00986	27080	4.43	OTHER	0	Cytoplasmic	Y	NC	regulation of transcription, DNA-templated [GO:0006355]	DNA binding [GO:0003677]	cytoplasm [GO:0005737]	147	9	0.14	0	0	0	191	11	0.14	0	0	0	#DIV/0!	0	#DIV/0!	0	1	1	#DIV/0!	#DIV/0!
gi|258508088|	YP_003170839.1	hypothetical protein LGG_01093	24929	10.26	SP(Sec/SPI)	0	Unknown	Y	C			integral component of membrane [GO:0016021]	1196	21	1.03	531	9	0.53	1267	20	1.03	1216	20	1.03	1.9434	0.514563	1	1	1	1	1.9434	0.514563
gi|258508108|	YP_003170859.1	hypothetical protein LGG_01113	16692	7.77	SP(Sec/SPI)	1	Unknown	Y	C		endonuclease activity [GO:0004519]		0	0	0	0	0	0	224	4	0.87	0	0	0	#DIV/0!	#DIV/0!	#DIV/0!	0	#DIV/0!	0	#DIV/0!	#DIV/0!
gi|258508350|	YP_003171101.1	hypothetical protein LGG_01355	5997	10.33	OTHER	0	Extracellular	Y	NC				0	0	0	0	0	0	332	5	0.71	0	0	0	#DIV/0!	#DIV/0!	#DIV/0!	0	#DIV/0!	0	#DIV/0!	#DIV/0!
gi|258508466|	YP_003171217.1	hypothetical protein LGG_01471	12418	4.59	OTHER	0	Cytoplasmic	Y	NC				0	0	0	0	0	0	148	7	0.74	0	0	0	#DIV/0!	#DIV/0!	#DIV/0!	0	#DIV/0!	0	#DIV/0!	#DIV/0!
gi|258508594|	YP_003171345.1	Hypothetical protein LGG_01599	14258	4.89	OTHER	0	Unknown	N	NM				212	7	0.63	0	0	0	158	5	0.28	0	0	0	#DIV/0!	0	#DIV/0!	0	0.444444	2.25	#DIV/0!	#DIV/0!
gi|258508688|	YP_003171439.1	Hypothetical protein LGG_01693	45372	10.4	OTHER	0	Unknown	Y	NC			integral component of membrane [GO:0016021]	116	3	0.08	0	0	0	157	8	0.17	70	2	0.08	#DIV/0!	0	2.125	0.470588	2.125	0.470588	#DIV/0!	0
gi|258508777|	YP_003171528.1	Hypothetical protein LGG_01782	13295	4.37	OTHER	0	Unknown	Y	NC				208	8	1.82	0	0	0	161	4	0.68	0	0	0	#DIV/0!	0	#DIV/0!	0	0.373626	2.67647	#DIV/0!	#DIV/0!
gi|258508948|	YP_003171699.1	hypothetical protein LGG_01953	128238	6.62	SP(Sec/SPI)	1	Unknown	Y	C			integral component of membrane [GO:0016021]	2429	63	0.81	1150	33	0.45	2203	62	0.76	1813	55	0.62	1.8	0.555556	1.22581	0.815789	0.938272	1.06579	1.37778	0.725806
gi|258509097|	YP_003171848.1	hypothetical protein LGG_02102	99177	9.7	OTHER	9	CytoplasmicMembrane	Y	NC			integral component of membrane [GO:0016021]	42	2	0.08	0	0	0	298	20	0.2	193	15	0.29	#DIV/0!	0	0.689655	1.45	2.5	0.4	#DIV/0!	0
gi|258509207|	YP_003171958.1	Hypothetical protein LGG_02212	17935	5.44	OTHER	0	Unknown	Y	NC				32	2	0.21	0	0	0	0	0	0	0	0	0	#DIV/0!	0	#DIV/0!	#DIV/0!	0	#DIV/0!	#DIV/0!	#DIV/0!
gi|258509260|	YP_003172011.1	Hypothetical protein LGG_02265	11601	4.67	OTHER	0	Unknown	N	NM		DNA binding [GO:0003677]	bacterial nucleoid [GO:0043590]; cytoplasm [GO:0005737]	53	4	0.34	0	0	0	148	5	0.34	0	0	0	#DIV/0!	0	#DIV/0!	0	1	1	#DIV/0!	#DIV/0!
gi|258509290|	YP_003172041.1	Hypothetical protein LGG_02295	14305	11.14	LIPO(Sec/SPII)	0	Unknown	Y	C				94	6	0.27	59	3	0.27	193	11	0.62	136	8	0.62	1	1	1	1	2.2963	0.435484	2.2963	0.435484
gi|258509368|	YP_003172119.1	hypothetical protein LGG_02373	20127	4.59	OTHER	0	Cytoplasmic	N	NM				0	0	0	0	0	0	265	11	0.69	0	0	0	#DIV/0!	#DIV/0!	#DIV/0!	0	#DIV/0!	0	#DIV/0!	#DIV/0!
gi|258509447|	YP_003172198.1	Hypothetical protein LGG_02452	8551	4.22	OTHER	0	Unknown	Y	NC				2344	97	21.79	427	14	3.77	2314	98	21.79	386	16	6.06	5.77984	0.173015	3.59571	0.278109	1	1	1.60743	0.622112
gi|258509627|	YP_003172378.1	Hypothetical protein LGG_02632	12741	4.23	OTHER	0	Unknown	Y	NC				74	4	0.71	0	0	0	292	10	1.24	0	0	0	#DIV/0!	0	#DIV/0!	0	1.74648	0.572581	#DIV/0!	#DIV/0!
gi|258509805|	YP_003172556.1	hypothetical protein LGG_02810	29923	9.79	OTHER	0	Unknown	Y	NC			integral component of membrane [GO:0016021]	163	5	0.27	32	2	0.27	319	11	0.43	161	6	0.43	1	1	1	1	1.59259	0.627907	1.59259	0.627907
gi|258509883|	YP_003172634.1	hypothetical protein LGG_02888	8144	3.84	OTHER	2	Cytoplasmic	N	NM				0	0	0	0	0	0	79	2	0.51	109	3	0.51	#DIV/0!	#DIV/0!	1	1	#DIV/0!	0	#DIV/0!	0
gi|258509886|	YP_003172637.1	Hypothetical protein LGG_02891	10028	4.52	OTHER	1	Unknown	Y	NC				75	3	0.4	0	0	0	0	0	0	0	0	0	#DIV/0!	0	#DIV/0!	#DIV/0!	0	#DIV/0!	#DIV/0!	#DIV/0!
gi|258507244|	YP_003169995.1	inosine-5'-monophosphate dehydrogenase	52642	5.99	OTHER	0	Cytoplasmic	N	NM	GMP biosynthetic process [GO:0006177]	IMP dehydrogenase activity [GO:0003938]; metal ion binding [GO:0046872]; nucleotide binding [GO:0000166]		0	0	0	0	0	0	197	6	0.23	0	0	0	#DIV/0!	#DIV/0!	#DIV/0!	0	#DIV/0!	0	#DIV/0!	#DIV/0!
gi|258507843|	YP_003170594.1	leucyl-tRNA synthetase	91625	4.84	OTHER	0	Cytoplasmic	Y	NC	leucyl-tRNA aminoacylation [GO:0006429]	aminoacyl-tRNA editing activity [GO:0002161]; ATP binding [GO:0005524]; leucine-tRNA ligase activity [GO:0004823]	cytoplasm [GO:0005737]	68	3	0.04	0	0	0	0	0	0	0	0	0	#DIV/0!	0	#DIV/0!	#DIV/0!	0	#DIV/0!	#DIV/0!	#DIV/0!
gi|258509220|	YP_003171971.1	LGG_02225 - glycosylated cell wall hydrolase - MltA	34162	7.74	SP(Sec/SPI)	1	Unknown	Y	C		hydrolase activity [GO:0016787]		56	1	0.11	585	9	0.52	474	8	0.23	1232	18	0.52	0.211538	4.72727	0.442308	2.26087	2.09091	0.478261	1	1
gi|258508012|	YP_003170763.1	Lipoprotein	40212	6.54	OTHER	0	Unknown	Y	NC				64	5	0.2	0	0	0	504	19	0.87	150	7	0.2	#DIV/0!	0	4.35	0.229885	4.35	0.229885	#DIV/0!	0
gi|258509302|	YP_003172053.1	Lipoprotein	32725	10.03	LIPO(Sec/SPII)	0	Unknown	Y	C		FMN binding [GO:0010181]	membrane [GO:0016020]	1199	34	1.39	1480	48	2.32	2634	95	4.13	3536	111	4.72	0.599138	1.66906	0.875	1.14286	2.97122	0.336562	2.03448	0.491525
gi|258509518|	YP_003172269.1	L-lactate dehydrogenase	35481	5.08	OTHER	0	Cytoplasmic	N	NM	glycolytic process [GO:0006096]	L-lactate dehydrogenase activity [GO:0004459]	cytoplasm [GO:0005737]	1044	30	1.48	246	7	0.22	941	24	1.02	419	12	0.5	6.72727	0.148649	2.04	0.490196	0.689189	1.45098	2.27273	0.44
gi|258509503|	YP_003172254.1	lysyl-tRNA synthetase	56539	5.09	OTHER	0	Cytoplasmic	N	NM	lysyl-tRNA aminoacylation [GO:0006430]	ATP binding [GO:0005524]; lysine-tRNA ligase activity [GO:0004824]; magnesium ion binding [GO:0000287]; nucleic acid binding [GO:0003676]	cytoplasm [GO:0005737]	99	4	0.14	0	0	0	89	3	0.07	0	0	0	#DIV/0!	0	#DIV/0!	0	0.5	2	#DIV/0!	#DIV/0!
gi|258507285|	YP_003170036.1	LytR family transcriptional regulator	40247	10.06	SP(Sec/SPI)	0	CytoplasmicMembrane	Y	C				144	8	0.31	125	6	0.31	307	14	0.71	48	4	0.19	1	1	3.73684	0.267606	2.29032	0.43662	0.612903	1.63158
gi|258509237|	YP_003171988.1	LytR family transcriptional regulator	39117	10	SP(Sec/SPI)	5	CytoplasmicMembrane	Y	C			integral component of membrane [GO:0016021]	46	3	0.1	0	0	0	468	9	0.2	0	0	0	#DIV/0!	0	#DIV/0!	0	2	0.5	#DIV/0!	#DIV/0!
gi|258509414|	YP_003172165.1	manganese ABC transporter substrate-binding protein	34996	9.81	SP(Sec/SPI)	0	CytoplasmicMembrane	Y	C	cell adhesion [GO:0007155]; metal ion transport [GO:0030001]	metal ion binding [GO:0046872]	integral component of membrane [GO:0016021]	0	0	0	0	0	0	53	4	0.11	0	0	0	#DIV/0!	#DIV/0!	#DIV/0!	0	#DIV/0!	0	#DIV/0!	#DIV/0!
gi|258508419|	YP_003171170.1	Manganese-dependent inorganic pyrophosphatase	33501	4.53	OTHER	2	Cytoplasmic	N	NM		inorganic diphosphatase activity [GO:0004427]; metal ion binding [GO:0046872]	cytoplasm [GO:0005737]	115	5	0.38	0	0	0	373	14	0.9	0	0	0	#DIV/0!	0	#DIV/0!	0	2.36842	0.422222	#DIV/0!	#DIV/0!
gi|258509579|	YP_003172330.1	Methionyl-tRNA synthetase/ protein secretion chaperonin, CsaA	74843	5.8	OTHER	6	Cytoplasmic	N	NM	methionyl-tRNA aminoacylation [GO:0006431]	ATP binding [GO:0005524]; methionine-tRNA ligase activity [GO:0004825]; tRNA binding [GO:0000049]	cytoplasm [GO:0005737]	236	12	0.27	0	0	0	696	22	0.34	0	0	0	#DIV/0!	0	#DIV/0!	0	1.25926	0.794118	#DIV/0!	#DIV/0!
gi|258508599|	YP_003171350.1	Molecular chaperone DnaK	67179	4.57	OTHER	1	Cytoplasmic	Y	NC	protein folding [GO:0006457]	ATP binding [GO:0005524]; unfolded protein binding [GO:0051082]		1248	41	0.71	74	5	0.11	1658	53	1.01	259	12	0.24	6.45455	0.15493	4.20833	0.237624	1.42254	0.70297	2.18182	0.458333
gi|258509332|	YP_003172083.1	Mucus binding factor (LGG_02337)	46492	9.6	SP(Sec/SPI)	0	Cellwall	Y	C			integral component of membrane [GO:0016021]	741	20	0.36	0	0	0	632	17	0.47	162	4	0.26	#DIV/0!	0	1.80769	0.553191	1.30556	0.765957	#DIV/0!	0
gi|258508857|	YP_003171608.1	N-acetylglucosamine-6-phosphate deacetylase	42414	4.92	OTHER	0	Cytoplasmic	N	NM	carbohydrate metabolic process [GO:0005975]; N-acetylglucosamine metabolic process [GO:0006044]	metal ion binding [GO:0046872]; N-acetylgalactosamine-6-phosphate deacetylase activity [GO:0047419]; N-acetylglucosamine-6-phosphate deacetylase activity [GO:0008448]		49	2	0.09	0	0	0	0	0	0	0	0	0	#DIV/0!	0	#DIV/0!	#DIV/0!	0	#DIV/0!	#DIV/0!	#DIV/0!
gi|258508561|	YP_003171312.1	N-acetylmuramoyl-L-alanine amidase	47271	9.27	SP(Sec/SPI)	0	Cellwall	Y	C	peptidoglycan catabolic process [GO:0009253]	N-acetylmuramoyl-L-alanine amidase activity [GO:0008745]		470	16	0.36	647	13	0.46	484	16	0.36	636	16	0.46	0.782609	1.27778	0.782609	1.27778	1	1	1	1
gi|258508463|	YP_003171214.1	Nitroreductase family protein	22746	4.91	OTHER	0	Cytoplasmic	N	NM	cellular response to oxidative stress [GO:0034599]	oxidoreductase activity, acting on NAD(P)H, nitrogenous group as acceptor [GO:0016657]		150	11	0.86	0	0	0	43	4	0.36	0	0	0	#DIV/0!	0	#DIV/0!	0	0.418605	2.38889	#DIV/0!	#DIV/0!
gi|258508940|	YP_003171691.1	Oligopeptide ABC transporter periplasmic protein	61182	10.15	LIPO(Sec/SPII)	0	Cellwall	Y	C	transmembrane transport [GO:0055085]		ATP-binding cassette (ABC) transporter complex [GO:0043190]	588	21	0.34	180	7	0.13	895	41	0.7	402	13	0.27	2.61538	0.382353	2.59259	0.385714	2.05882	0.485714	2.07692	0.481481
gi|258508482|	YP_003171233.1	penicillin-binding protein 1A	83585	9.44	OTHER	2	CytoplasmicMembrane	Y	NC		penicillin binding [GO:0008658]; transferase activity [GO:0016740]		173	6	0.14	303	10	0.19	1647	37	0.48	1106	25	0.3	0.736842	1.35714	1.6	0.625	3.42857	0.291667	1.57895	0.633333
gi|258507789|	YP_003170540.1	penicillin-binding protein 1B	99259	9.48	OTHER	0	CytoplasmicMembrane	Y	NC		carboxypeptidase activity [GO:0004180]; penicillin binding [GO:0008658]; transferase activity [GO:0016740]	integral component of membrane [GO:0016021]	48	3	0.08	255	8	0.12	1049	29	0.29	493	16	0.16	0.666667	1.5	1.8125	0.551724	3.625	0.275862	1.33333	0.75
gi|258507377|	YP_003170128.1	penicillin-binding protein 3	69670	9.79	OTHER	0	CytoplasmicMembrane	Y	NC	cell division [GO:0051301]; response to antibiotic [GO:0046677]	penicillin binding [GO:0008658]	integral component of membrane [GO:0016021]	0	0	0	0	0	0	45	5	0.11	0	0	0	#DIV/0!	#DIV/0!	#DIV/0!	0	#DIV/0!	0	#DIV/0!	#DIV/0!
gi|258508775|	YP_003171526.1	Peptidylprolyl cis-trans isomerase PrsA1	33583	10.27	LIPO(Sec/SPII)	0	CytoplasmicMembrane	Y	C	protein folding [GO:0006457]	peptidyl-prolyl cis-trans isomerase activity [GO:0003755]	plasma membrane [GO:0005886]	621	9	0.38	297	3	0.11	2303	61	2.58	750	13	0.53	3.45455	0.289474	4.86792	0.205426	6.78947	0.147287	4.81818	0.207547
gi|258509270|	YP_003172021.1	peptidyl-prolyl isomerase	33136	10.34	LIPO(Sec/SPII)	0	CytoplasmicMembrane	Y	C	protein folding [GO:0006457]	peptidyl-prolyl cis-trans isomerase activity [GO:0003755]	plasma membrane [GO:0005886]	0	0	0	0	0	0	101	4	0.24	0	0	0	#DIV/0!	#DIV/0!	#DIV/0!	0	#DIV/0!	0	#DIV/0!	#DIV/0!
gi|258509896|	YP_003172647.1	Phage-related prohead protease	56962	4.47	OTHER	0	Unknown	Y	NC				272	14	0.37	0	0	0	126	10	0.29	0	0	0	#DIV/0!	0	#DIV/0!	0	0.783784	1.27586	#DIV/0!	#DIV/0!
gi|258507954|	YP_003170705.1	phosphate acetyltransferase	35204	5.27	OTHER	0	Cytoplasmic	N	NM		acetyltransferase activity [GO:0016407]		0	0	0	0	0	0	67	3	0.23	0	0	0	#DIV/0!	#DIV/0!	#DIV/0!	0	#DIV/0!	0	#DIV/0!	#DIV/0!
gi|258508816|	YP_003171567.1	phosphocarrier protein HPr	9248	4.57	OTHER	1	Cytoplasmic	N	NM	phosphoenolpyruvate-dependent sugar phosphotransferase system [GO:0009401]		cytoplasm [GO:0005737]	134	6	0.44	56	2	0.44	96	6	0.44	114	5	0.44	1	1	1	1	1	1	1	1
gi|258508815|	YP_003171566.1	Phosphoenolpyruvate-protein phosphotransferase	63270	4.76	OTHER	0	Cytoplasmic	N	NM	phosphoenolpyruvate-dependent sugar phosphotransferase system [GO:0009401]	kinase activity [GO:0016301]; metal ion binding [GO:0046872]; phosphoenolpyruvate-protein phosphotransferase activity [GO:0008965]	cytoplasm [GO:0005737]	390	15	0.26	64	3	0.12	489	16	0.33	73	2	0.06	2.16667	0.461538	5.5	0.181818	1.26923	0.787879	0.5	2
gi|258507916|	YP_003170667.1	Phosphoglucomutase	63585	5.08	OTHER	1	Cytoplasmic	N	NM	carbohydrate metabolic process [GO:0005975]	magnesium ion binding [GO:0000287]; phosphoglucomutase activity [GO:0004614]		45	3	0.19	0	0	0	421	27	0.76	0	0	0	#DIV/0!	0	#DIV/0!	0	4	0.25	#DIV/0!	#DIV/0!
gi|258507977|	YP_003170728.1	Phosphoglucosamine mutase	48851	4.45	OTHER	0	Cytoplasmic	N	NM	carbohydrate metabolic process [GO:0005975]	magnesium ion binding [GO:0000287]; phosphoglucosamine mutase activity [GO:0008966]		52	3	0.16	0	0	0	159	8	0.16	0	0	0	#DIV/0!	0	#DIV/0!	0	1	1	#DIV/0!	#DIV/0!
gi|258507929|	YP_003170680.1	Phosphoglycerate kinase	42187	5.73	OTHER	0	Cytoplasmic	N	NM	glycolytic process [GO:0006096]	ATP binding [GO:0005524]; phosphoglycerate kinase activity [GO:0004618]	cytoplasm [GO:0005737]	1966	69	4.49	286	15	0.81	2640	79	4.49	416	20	0.98	5.54321	0.180401	4.58163	0.218263	1	1	1.20988	0.826531
gi|258509133|	YP_003171884.1	phosphoglyceromutase	25938	5.19	OTHER	0	Cytoplasmic	N	NM	gluconeogenesis [GO:0006094]; glycolytic process [GO:0006096]	2,3-bisphosphoglycerate-dependent phosphoglycerate mutase activity [GO:0046538]		1213	33	1.6	79	4	0.31	1060	32	0.98	30	3	0.31	5.16129	0.19375	3.16129	0.316327	0.6125	1.63265	1	1
gi|258507439|	YP_003170190.1	pilus specific protein (SpaC) (2 replica)	96790	5.12	SP(Sec/SPI)	0	Cellwall	Y	C			integral component of membrane [GO:0016021]	0	0	0	0	0	0	0	0	0	57	3	0.04	#DIV/0!	#DIV/0!	0	#DIV/0!	#DIV/0!	#DIV/0!	#DIV/0!	0
gi|258508613|	YP_003171364.1	Prolyl-tRNA synthetase	64268	5.2	OTHER	0	Cytoplasmic	N	NM	prolyl-tRNA aminoacylation [GO:0006433]	aminoacyl-tRNA editing activity [GO:0002161]; ATP binding [GO:0005524]; proline-tRNA ligase activity [GO:0004827]	cytoplasm [GO:0005737]	155	7	0.12	38	3	0.06	85	5	0.12	34	4	0.12	2	0.5	1	1	1	1	2	0.5
gi|258508354|	YP_003171105.1	PTS system fructose-specific transporter subunit IIABC	70083	6.7	OTHER	1	CytoplasmicMembrane	Y	NC	phosphoenolpyruvate-dependent sugar phosphotransferase system [GO:0009401]	carbohydrate:proton symporter activity [GO:0005351]; protein-N(PI)-phosphohistidine-fructose phosphotransferase system transporter activity [GO:0022877]	integral component of membrane [GO:0016021]; plasma membrane [GO:0005886]	0	0	0	0	0	0	257	8	0.17	125	6	0.11	#DIV/0!	#DIV/0!	1.54545	0.647059	#DIV/0!	0	#DIV/0!	0
gi|258507341|	YP_003170092.1	PTS system galactitol-specific transporter subunit IIB	10627	5.1	OTHER	0	Cytoplasmic	N	NM	phosphoenolpyruvate-dependent sugar phosphotransferase system [GO:0009401]	protein-N(PI)-phosphohistidine-sugar phosphotransferase activity [GO:0008982]		0	0	0	0	0	0	85	4	0.89	0	0	0	#DIV/0!	#DIV/0!	#DIV/0!	0	#DIV/0!	0	#DIV/0!	#DIV/0!
gi|258509833|	YP_003172584.1	PTS system mannose-specific transporter subunit IIAB	35398	5.78	OTHER	0	Cytoplasmic	N	NM	phosphoenolpyruvate-dependent sugar phosphotransferase system [GO:0009401]	protein-N(PI)-phosphohistidine-sugar phosphotransferase activity [GO:0008982]	cytoplasm [GO:0005737]; integral component of membrane [GO:0016021]	214	6	0.11	100	4	0.11	232	6	0.11	185	6	0.11	1	1	1	1	1	1	1	1
gi|258509831|	YP_003172582.1	PTS system mannose-specific transporter subunit IID	33393	9.98	OTHER	1	CytoplasmicMembrane	Y	NC	phosphoenolpyruvate-dependent sugar phosphotransferase system [GO:0009401]		integral component of membrane [GO:0016021]	347	11	0.53	0	0	0	287	6	0.24	0	0	0	#DIV/0!	0	#DIV/0!	0	0.45283	2.20833	#DIV/0!	#DIV/0!
gi|258507233|	YP_003169984.1	pyrrolidone-carboxylate peptidase	23502	5.33	OTHER	0	Cytoplasmic	N	NM		cysteine-type peptidase activity [GO:0008234]; pyroglutamyl-peptidase activity [GO:0016920]	cytosol [GO:0005829]	173	4	0.16	0	0	0	326	6	0.16	45	2	0.16	#DIV/0!	0	1	1	1	1	#DIV/0!	0
gi|258508317|	YP_003171068.1	pyruvate dehydrogenase complex E2 component	46779	4.82	OTHER	1	Cytoplasmic	N	NM		hydrolase activity [GO:0016787]; transferase activity, transferring acyl groups [GO:0016746]		89	3	0.08	0	0	0	411	8	0.17	0	0	0	#DIV/0!	0	#DIV/0!	0	2.125	0.470588	#DIV/0!	#DIV/0!
gi|258508315|	YP_003171066.1	pyruvate dehydrogenase E1 component subunit alpha	40699	5.15	OTHER	0	Cytoplasmic	Y	NC	glycolytic process [GO:0006096]	pyruvate dehydrogenase (acetyl-transferring) activity [GO:0004739]		0	0	0	0	0	0	60	3	0.09	0	0	0	#DIV/0!	#DIV/0!	#DIV/0!	0	#DIV/0!	0	#DIV/0!	#DIV/0!
gi|258508316|	YP_003171067.1	pyruvate dehydrogenase E1 component subunit beta	35219	5.08	OTHER	0	Cytoplasmic	N	NM		catalytic activity [GO:0003824]		0	0	0	0	0	0	38	6	0.36	0	0	0	#DIV/0!	#DIV/0!	#DIV/0!	0	#DIV/0!	0	#DIV/0!	#DIV/0!
gi|258508370|	YP_003171121.1	Pyruvate kinase	62866	5.07	OTHER	0	Cytoplasmic	N	NM		kinase activity [GO:0016301]; magnesium ion binding [GO:0000287]; potassium ion binding [GO:0030955]; pyruvate kinase activity [GO:0004743]		2843	99	2.98	469	12	0.33	3221	96	2.54	732	17	0.41	9.0303	0.110738	6.19512	0.161417	0.852349	1.17323	1.24242	0.804878
gi|258509556|	YP_003172307.1	Ribose-phosphate pyrophosphokinase	35478	7.3	OTHER	1	Cytoplasmic	N	NM	5-phosphoribose 1-diphosphate biosynthetic process [GO:0006015]; nucleoside metabolic process [GO:0009116]; nucleotide biosynthetic process [GO:0009165]; ribonucleoside monophosphate biosynthetic process [GO:0009156]	ATP binding [GO:0005524]; kinase activity [GO:0016301]; magnesium ion binding [GO:0000287]; ribose phosphate diphosphokinase activity [GO:0004749]	cytoplasm [GO:0005737]	77	3	0.22	0	0	0	142	5	0.35	0	0	0	#DIV/0!	0	#DIV/0!	0	1.59091	0.628571	#DIV/0!	#DIV/0!
gi|258507891|	YP_003170642.1	Ribosomal subunit interface protein	21077	8.76	OTHER	0	Cytoplasmic	N	NM	primary metabolic process [GO:0044238]; regulation of translation [GO:0006417]		cytoplasm [GO:0005737]	82	2	0.18	0	0	0	567	11	0.65	0	0	0	#DIV/0!	0	#DIV/0!	0	3.61111	0.276923	#DIV/0!	#DIV/0!
gi|258508619|	YP_003171370.1	ribosome recycling factor	20566	5.2	OTHER	0	Cytoplasmic	N	NM	translational termination [GO:0006415]		cytoplasm [GO:0005737]	0	0	0	0	0	0	128	5	0.41	0	0	0	#DIV/0!	#DIV/0!	#DIV/0!	0	#DIV/0!	0	#DIV/0!	#DIV/0!
gi|258508606|	YP_003171357.1	ribosome-binding factor A	13301	9	OTHER	0	Cytoplasmic	N	NM	maturation of SSU-rRNA [GO:0030490]		cytoplasm [GO:0005737]	0	0	0	0	0	0	83	5	1.17	0	0	0	#DIV/0!	#DIV/0!	#DIV/0!	0	#DIV/0!	0	#DIV/0!	#DIV/0!
gi|258508260|	YP_003171011.1	Rod shape-determining protein MreB	35022	4.5	OTHER	0	Cytoplasmic	N	NM	cell morphogenesis [GO:0000902]			115	6	0.36	0	0	0	132	8	0.36	0	0	0	#DIV/0!	0	#DIV/0!	0	1	1	#DIV/0!	#DIV/0!
gi|258508183|	YP_003170934.1	rod shape-determining protein MreB	34965	5.1	OTHER	4	Cytoplasmic	N	NM	cell morphogenesis [GO:0000902]			0	0	0	0	0	0	39	3	0.23	0	0	0	#DIV/0!	#DIV/0!	#DIV/0!	0	#DIV/0!	0	#DIV/0!	#DIV/0!
gi|258507837|	YP_003170588.1	S-adenosylmethionine synthetase	43141	4.61	OTHER	0	Cytoplasmic	N	NM	one-carbon metabolic process [GO:0006730]; S-adenosylmethionine biosynthetic process [GO:0006556]	ATP binding [GO:0005524]; magnesium ion binding [GO:0000287]; methionine adenosyltransferase activity [GO:0004478]	cytoplasm [GO:0005737]	0	0	0	0	0	0	184	5	0.18	0	0	0	#DIV/0!	#DIV/0!	#DIV/0!	0	#DIV/0!	0	#DIV/0!	#DIV/0!
gi|258507749|	YP_003170500.1	S-adenosylmethionine--tRNA ribosyltransferase-isomerase	40314	5.98	OTHER	0	Cytoplasmic	N	NM	queuosine biosynthetic process [GO:0008616]	isomerase activity [GO:0016853]; transferase activity, transferring glycosyl groups [GO:0016757]	cytoplasm [GO:0005737]	0	0	0	0	0	0	178	6	0.19	0	0	0	#DIV/0!	#DIV/0!	#DIV/0!	0	#DIV/0!	0	#DIV/0!	#DIV/0!
gi|258509801|	YP_003172552.1	Serine protease - HtrA-like	45175	6.06	OTHER	0	Unknown	Y	NC		serine-type endopeptidase activity [GO:0004252]	integral component of membrane [GO:0016021]	96	2	0.08	0	0	0	1480	36	1.22	567	12	0.61	#DIV/0!	0	2	0.5	15.25	0.0655738	#DIV/0!	0
gi|258508888|	YP_003171639.1	seryl-tRNA synthetase	48880	5.91	OTHER	0	Cytoplasmic	N	NM	selenocysteine biosynthetic process [GO:0016260]; selenocysteinyl-tRNA(Sec) biosynthetic process [GO:0097056]; seryl-tRNA aminoacylation [GO:0006434]	ATP binding [GO:0005524]; serine-tRNA ligase activity [GO:0004828]	cytoplasm [GO:0005737]	157	9	0.25	0	0	0	201	8	0.25	0	0	0	#DIV/0!	0	#DIV/0!	0	1	1	#DIV/0!	#DIV/0!
gi|258507670|	YP_003170421.1	Small heat shock protein	17820	4.68	OTHER	1	Cellwall	Y	NC				108	7	0.48	0	0	0	381	20	2.24	0	0	0	#DIV/0!	0	#DIV/0!	0	4.66667	0.214286	#DIV/0!	#DIV/0!
gi|258509138|	YP_003171889.1	Sortase A	25829	10.51	OTHER	0	Unknown	Y	NC				0	0	0	0	0	0	91	6	0.32	53	3	0.15	#DIV/0!	#DIV/0!	2.13333	0.46875	#DIV/0!	0	#DIV/0!	0
gi|258507745|	YP_003170496.1	S-ribosylhomocysteinase	17416	6.23	OTHER	0	Cytoplasmic	N	NM	quorum sensing [GO:0009372]	iron ion binding [GO:0005506]; S-ribosylhomocysteine lyase activity [GO:0043768]		49	3	0.49	0	0	0	313	12	0.83	0	0	0	#DIV/0!	0	#DIV/0!	0	1.69388	0.590361	#DIV/0!	#DIV/0!
gi|258507946|	YP_003170697.1	Sugar ABC transporter substrate-binding protein	48326	10.1	LIPO(Sec/SPII)	0	Unknown	Y	C				630	33	0.82	365	13	0.68	970	35	1.34	898	37	1.52	1.20588	0.829268	0.881579	1.13433	1.63415	0.61194	2.23529	0.447368
gi|258507324|	YP_003170075.1	Sugar ABC transporter substrate-binding protein	46854	10.12	LIPO(Sec/SPII)	0	Unknown	Y	C				0	0	0	0	0	0	483	18	0.47	137	8	0.17	#DIV/0!	#DIV/0!	2.76471	0.361702	#DIV/0!	0	#DIV/0!	0
gi|258509846|	YP_003172597.1	sugar ABC transporter substrate-binding protein	46607	10.13	LIPO(Sec/SPII)	0	Unknown	Y	C				87	3	0.08	0	0	0	1161	41	1.45	1020	35	1.11	#DIV/0!	0	1.30631	0.765517	18.125	0.0551724	#DIV/0!	0
gi|258508077|	YP_003170828.1	sulfatase	84067	7.22	OTHER	0	CytoplasmicMembrane	Y	NC		metal ion binding [GO:0046872]; sulfuric ester hydrolase activity [GO:0008484]	integral component of membrane [GO:0016021]	0	0	0	0	0	0	366	9	0.19	249	13	0.24	#DIV/0!	#DIV/0!	0.791667	1.26316	#DIV/0!	0	#DIV/0!	0
gi|258507825|	YP_003170576.1	Sulfatase	77924	8.97	OTHER	0	CytoplasmicMembrane	Y	NC		metal ion binding [GO:0046872]; sulfuric ester hydrolase activity [GO:0008484]	integral component of membrane [GO:0016021]	0	0	0	0	0	0	1311	32	0.52	47	3	0.1	#DIV/0!	#DIV/0!	5.2	0.192308	#DIV/0!	0	#DIV/0!	0
gi|258507026|	YP_003169777.1	surface antigen	42631	7.7	SP(Sec/SPI)	0	Extracellular	Y	C				1355	42	0.96	2947	72	1.13	1256	32	0.96	3167	78	0.96	0.849558	1.17708	1	1	1	1	0.849558	1.17708
gi|258509011|	YP_003171762.1	Surface antigen NLP/P60	40947	9.06	SP(Sec/SPI)	0	Extracellular	Y	C				1868	50	1.4	3448	92	1.86	1540	41	1.2	4139	96	1.86	0.752688	1.32857	0.645161	1.55	0.857143	1.16667	1	1
gi|258509570|	YP_003172321.1	Tagatose 1,6-diphosphate aldolase	36334	4.9	OTHER	0	Unknown	Y	NC	D-tagatose 6-phosphate catabolic process [GO:2001059]; lactose catabolic process via tagatose-6-phosphate [GO:0019512]	tagatose-6-phosphate kinase activity [GO:0009024]; tagatose-bisphosphate aldolase activity [GO:0009025]		2299	52	2.6	475	13	0.81	3005	69	3.39	642	15	0.81	3.20988	0.311538	4.18519	0.238938	1.30385	0.766962	1	1
gi|258507328|	YP_003170079.1	tagatose-6-phosphate ketose/aldose isomerase	43011	4.54	OTHER	0	Cytoplasmic	N	NM	carbohydrate derivative metabolic process [GO:1901135]	carbohydrate derivative binding [GO:0097367]; isomerase activity [GO:0016853]		0	0	0	0	0	0	44	4	0.09	0	0	0	#DIV/0!	#DIV/0!	#DIV/0!	0	#DIV/0!	0	#DIV/0!	#DIV/0!
gi|258508290|	YP_003171041.1	tellurite resistance protein	44104	5	OTHER	0	Cytoplasmic	Y	NC				0	0	0	0	0	0	32	4	0.09	32	2	0.08	#DIV/0!	#DIV/0!	1.125	0.888889	#DIV/0!	0	#DIV/0!	0
gi|258507863|	YP_003170614.1	thiamine biosynthesis lipoprotein	38619	9.93	LIPO(Sec/SPII)	4	Unknown	Y	C	protein flavinylation [GO:0017013]	metal ion binding [GO:0046872]; transferase activity [GO:0016740]		529	17	0.59	250	7	0.32	670	27	0.91	421	15	0.45	1.84375	0.542373	2.02222	0.494505	1.54237	0.648352	1.40625	0.711111
gi|258507915|	YP_003170666.1	thioredoxin reductase	34270	5.23	OTHER	2	Cytoplasmic	N	NM	removal of superoxide radicals [GO:0019430]	thioredoxin-disulfide reductase activity [GO:0004791]	cytoplasm [GO:0005737]	47	4	0.11	0	0	0	0	0	0	0	0	0	#DIV/0!	0	#DIV/0!	#DIV/0!	0	#DIV/0!	#DIV/0!	#DIV/0!
gi|258508749|	YP_003171500.1	Threonyl-tRNA synthetase	74819	5.18	OTHER	0	Cytoplasmic	N	NM	threonyl-tRNA aminoacylation [GO:0006435]	ATP binding [GO:0005524]; metal ion binding [GO:0046872]; threonine-tRNA ligase activity [GO:0004829]; tRNA binding [GO:0000049]	cytoplasm [GO:0005737]	341	23	0.4	0	0	0	452	25	0.55	0	0	0	#DIV/0!	0	#DIV/0!	0	1.375	0.727273	#DIV/0!	#DIV/0!
gi|258508708|	YP_003171459.1	transcription elongation factor GreA	17145	4.52	OTHER	0	Cytoplasmic	N	NM	regulation of DNA-templated transcription, elongation [GO:0032784]	DNA binding [GO:0003677]; RNA polymerase binding [GO:0070063]; translation elongation factor activity [GO:0003746]		0	0	0	0	0	0	207	6	0.85	0	0	0	#DIV/0!	#DIV/0!	#DIV/0!	0	#DIV/0!	0	#DIV/0!	#DIV/0!
gi|258508610|	YP_003171361.1	Transcription elongation factor NusA	44546	4.2	OTHER	2	Cytoplasmic	N	NM	DNA-templated transcription, termination [GO:0006353]; transcription antitermination [GO:0031564]	DNA-binding transcription factor activity [GO:0003700]; translation elongation factor activity [GO:0003746]	cytoplasm [GO:0005737]	59	3	0.18	0	0	0	0	0	0	0	0	0	#DIV/0!	0	#DIV/0!	#DIV/0!	0	#DIV/0!	#DIV/0!	#DIV/0!
gi|258508742|	YP_003171493.1	Translation initiation factor 3	17281	10.84	OTHER	0	Cytoplasmic	N	NM		translation initiation factor activity [GO:0003743]	cytoplasm [GO:0005737]	109	3	0.22	0	0	0	277	10	0.83	0	0	0	#DIV/0!	0	#DIV/0!	0	3.77273	0.26506	#DIV/0!	#DIV/0!
gi|258509460|	YP_003172211.1	Translation initiation factor IF-1	8142	9.58	OTHER	1	Cytoplasmic	N	NM		ribosome binding [GO:0043022]; rRNA binding [GO:0019843]; translation initiation factor activity [GO:0003743]	cytoplasm [GO:0005737]	45	3	0.51	0	0	0	85	4	0.51	0	0	0	#DIV/0!	0	#DIV/0!	0	1	1	#DIV/0!	#DIV/0!
gi|258508607|	YP_003171358.1	translation initiation factor IF-2	102428	10.26	OTHER	0	Cytoplasmic	N	NM		GTPase activity [GO:0003924]; GTP binding [GO:0005525]; translation initiation factor activity [GO:0003743]	cytoplasm [GO:0005737]	0	0	0	0	0	0	32	2	0.07	0	0	0	#DIV/0!	#DIV/0!	#DIV/0!	0	#DIV/0!	0	#DIV/0!	#DIV/0!
gi|258509914|	YP_003172665.1	transporter RND superfamily	38942	9.62	OTHER	2	Unknown	Y	NC			integral component of membrane [GO:0016021]	0	0	0	0	0	0	851	22	0.74	804	21	0.74	#DIV/0!	#DIV/0!	1	1	#DIV/0!	0	#DIV/0!	0
gi|258508346|	YP_003171097.1	trigger factor	49751	4.31	OTHER	0	Cytoplasmic	Y	NC	cell cycle [GO:0007049]; cell division [GO:0051301]; protein folding [GO:0006457]; protein transport [GO:0015031]	peptidyl-prolyl cis-trans isomerase activity [GO:0003755]	cytoplasm [GO:0005737]	1308	49	1.76	313	12	0.34	1802	64	1.56	481	15	0.34	5.17647	0.193182	4.58824	0.217949	0.886364	1.12821	1	1
gi|258507930|	YP_003170681.1	Triosephosphate isomerase	27019	4.63	OTHER	0	Cytoplasmic	N	NM	gluconeogenesis [GO:0006094]; glycolytic process [GO:0006096]	triose-phosphate isomerase activity [GO:0004807]	cytoplasm [GO:0005737]	1159	27	1.87	439	11	0.69	1035	29	1.87	400	10	0.93	2.71014	0.368984	2.01075	0.497326	1	1	1.34783	0.741935
gi|258508203|	YP_003170954.1	Universal stress protein family	18219	6.8	OTHER	1	Cytoplasmic	N	NM			cytoplasm [GO:0005737]	86	5	0.47	0	0	0	132	6	0.47	0	0	0	#DIV/0!	0	#DIV/0!	0	1	1	#DIV/0!	#DIV/0!
gi|258508170|	YP_003170921.1	Uracil phosphoribosyltransferase	22780	7.18	OTHER	0	Cytoplasmic	N	NM	nucleoside metabolic process [GO:0009116]; UMP salvage [GO:0044206]; uracil salvage [GO:0006223]	GTP binding [GO:0005525]; magnesium ion binding [GO:0000287]; uracil phosphoribosyltransferase activity [GO:0004845]		257	5	0.36	0	0	0	336	11	1.17	0	0	0	#DIV/0!	0	#DIV/0!	0	3.25	0.307692	#DIV/0!	#DIV/0!
gi|258509146|	YP_003171897.1	UspA family universal stress protein	16874	4.84	OTHER	1	Cytoplasmic	N	NM				209	6	0.86	0	0	0	287	8	0.86	0	0	0	#DIV/0!	0	#DIV/0!	0	1	1	#DIV/0!	#DIV/0!
gi|258508057|	YP_003170808.1	UTP-glucose-1-phosphate uridylyltransferase	33950	6.19	OTHER	0	Cytoplasmic	N	NM	biosynthetic process [GO:0009058]; UDP-glucose metabolic process [GO:0006011]	UTP:glucose-1-phosphate uridylyltransferase activity [GO:0003983]		680	24	1.32	42	3	0.23	836	30	1.09	116	5	0.52	5.73913	0.174242	2.09615	0.477064	0.825758	1.21101	2.26087	0.442308
gi|258509213|	YP_003171964.1	XRE family transcriptional regulator	14033	5.92	OTHER	0	Cytoplasmic	Y	NC		sequence-specific DNA binding [GO:0043565]		168	4	0.64	0	0	0	277	6	0.64	0	0	0	#DIV/0!	0	#DIV/0!	0	1	1	#DIV/0!	#DIV/0!

## Sheet: Sheet2
Table 1. Surfaeome proteins that were specifically identified from the biofilm and planktonic cells. Cells in red and blue, proteins specifically produced in biofilm and planktonic cells, respectively. Cells in grean and yellow, proteins specifically produced during growth on fructose and glucose, respectively. Fold-changes in red, green and yellow cells refer to increased abundance of the protei…
ACCESSION NO.	PROTEIN DESCRIPTION		GROWTH MODE INDUCED CHANGES		CARBON SOURCE INDUCED CHANGES
		Mr (Da)	Glucose	Fructose	Planktonic	Biofilm
Transport(ers)
gi|258509418|ref|YP_003172169.1|	ABC transporter metal ion transporter periplasmic component/surface adhesin	33403		6.1-fold	Frc-U	Frc-U
gi|258507196|ref|YP_003169947.1|	ABC transporter oligopeptide-binding protein	59874		4.1-fold	Frc-U	Frc-U
gi|258508219|ref|YP_003170970.1|	ABC transporter oligopeptide-binding protein	60385		2.5-fold		Frc-U
gi|258507967|ref|YP_003170718.1|	ABC transporter spermidine/putrescine-binding protein	40688		BC-U		Frc-U
gi|258507684|ref|YP_003170435.1|	ABC transporter substrate-binding protein	34553		BC-U		Frc-U
gi|258508191|ref|YP_003170942.1|	ABC transporter substrate-binding protein, NLPA lipoprotein	30718		4.0-fold	Frc-U	Frc-U
gi|258509418|ref|YP_003172169.1|	ABC transporter metal ion transporter periplasmic component/surface adhesin	33403		6.1-fold	Frc-U	Frc-U
gi|258507967|ref|YP_003170718.1|	ABC transporter spermidine/putrescine-binding protein	40688		BC-U		Frc-U
gi|258509141|ref|YP_003171892.1|	glycine/betaine ABC transporter substrate-binding protein	32897		BC-U		Frc-U
gi|258507071|ref|YP_003169822.1|	glycine/betaine ABC transporter substrate-binding protein	34862		BC-U		Frc-U
gi|258508354|ref|YP_003171105.1|	PTS system fructose-specific transporter subunit IIABC	70083		2.1-fold	Frc-U	Frc-U
gi|258507341|ref|YP_003170092.1|	PTS system galactitol-specific transporter subunit IIB	10627		BC-U		Frc-U
gi|258509831|ref|YP_003172582.1|	PTS system mannose-specific transporter subunit IID	33393	BC-U	BC-U
gi|258509856|ref|YP_003172607.1|	glutamine ABC transporter ATP-binding protein	26823	BC-U			Glc-U
gi|258509846|ref|YP_003172597.1|	sugar ABC transporter substrate-binding protein	46607	BC-U		Frc-U	13.3-fold
gi|258507324|ref|YP_003170075.1|	sugar ABC transporter substrate-binding protein	46854		3.5-fold	Frc-U	Frc-U
gi|258509414|ref|YP_003172165.1|	manganese ABC transporter substrate-binding protein	34996		2.0-fold		Frc-U
gi|258509914|ref|YP_003172665.1|	transporter RND superfamily	38942			Frc-U	Frc-U
Cell-membrane/wall	Adhesins, biogenesis and cell division
gi|258507437|ref|YP_003170188.1|	pilus specific protein (SpaA)	35881	PC-U		Glc-U
gi|258507439|ref|YP_003170190.1|	pilus specific protein (SpaC)	96790	PC-U	PC-U
gi|258509332|ref|YP_003172083.1|	Mucus binding factor - MBF (LGG_02337)	46492	BC-U	3.9-fold	Frc-U
gi|258507672|ref|YP_003170423.1|	esterase/lipase	28367		BC-U		Frc-U
gi|258507775|ref|YP_003170526.1|	extramembranal protein DltD	47974		14.3-fold	Frc-U	Frc-U
gi|258508176|ref|YP_003170927.1|	F0F1 ATP synthase subunit alpha	55253	BC-U	40.1-fold
gi|258509269|ref|YP_003172020.1|	endopeptidase lactocepin (prtP)	206509	BC-U	2.8-fold	Frc-U	6.2-fold
gi|258509918|ref|YP_003172669.1|	adhesion exoprotein	270752		BC-U		Frc-U
gi|258507314|ref|YP_003170065.1|	alpha/beta hydrolase superfamily protein	33103		1.475	Frc-U	Frc-U
gi|258509509|ref|YP_003172260.1|	cell division protein FtsH	78189	BC-U			Glc-U
gi|258508275|ref|YP_003171026.1|	cell division protein FtsI	76741		13.8-fold	Frc-U	Frc-U
gi|258508260|ref|YP_003171011.1|	rod shape-determining protein MreB (negative regulator of FtsI)	35022	BC-U	BC-U
gi|258508183|ref|YP_003170934.1|	rod shape-determining protein MreB (negative regulator of FtsI)	34965		BC-U		Frc-U
gi|258508701|ref|YP_003171452.1|	cell division protein/penicillin-binding protein 2	77383		3.6-fold	Frc-U	Frc-U
gi|258507178|ref|YP_003169929.1|	cell surface protein	28466	PC-U		Glc-U
gi|258508012|ref|YP_003170763.1|	lipoprotein	40212	BC-U	3.3-fold	Frc-U	7.9.-fold
gi|258509138|ref|YP_003171889.1|	sortase A	25829		1.7-fold	Frc-U	Frc-U
Moonlighting proteins	Protein synthesis
gi|258509473|ref|YP_003172224.1|	30S ribosomal protein S17	10095	BC-U	BC-U
gi|258507008|ref|YP_003169759.1|	30S ribosomal protein S18	9122	BC-U	2.7-fold	Frc-U	2.5-fold
gi|258509476|ref|YP_003172227.1|	30S ribosomal protein S3	24933	BC-U	BC-U
gi|258508250|ref|YP_003171001.1|	30S ribosomal protein S4	23318	BC-U	3.3-fold	Frc-U
gi|258507006|ref|YP_003169757.1|	30S ribosomal protein S6	11566	10.9-fold	14.7-fold	Glc-U
gi|258509284|ref|YP_003172035.1|	50S ribosomal protein L11	14871	11.8-fold	BC-U	Glc-U	1.6-fold
gi|258509443|ref|YP_003172194.1|	50S ribosomal protein L13	16564	BC-U	11.5-fold		1.7-fold
gi|258509472|ref|YP_003172223.1|	50S ribosomal protein L14	13027	5.3-fold	BC-U	Glc-U
gi|258509475|ref|YP_003172226.1|	50S ribosomal protein L16	15999	BC-U	BC-U
gi|258509466|ref|YP_003172217.1|	50S ribosomal protein L18	13007	BC-U	7.3-fold		1.8-fold
gi|258508634|ref|YP_003171385.1|	50S ribosomal protein L19	13342		BC-U		Frc-U
gi|258509479|ref|YP_003172230.1|	50S ribosomal protein L2	30378	8.6-fold	26.4-fold	Glc-U	1.5-fold
gi|258508740|ref|YP_003171491.1|	50S ribosomal protein L20	13455	BC-U	BC-U		1.5-fold
gi|258508685|ref|YP_003171436.1|	50S ribosomal protein L21	11300	5.3-fold	BC-U	Glc-U
gi|258509471|ref|YP_003172222.1|	50S ribosomal protein L24	11239		2.6-fold	Frc-U	Frc-U
gi|258508683|ref|YP_003171434.1|	50S ribosomal protein L27	10375	BC-U	1.6-fold	Frc-U
gi|258509539|ref|YP_003172290.1|	50S ribosomal protein L31	9606	BC-U	BC-U		1.9-fold
gi|258508363|ref|YP_003171114.1|	50S ribosomal protein L32	7077	7.2-fold	BC-U	Glc-U
gi|258508899|ref|YP_003171650.1|	50S ribosomal protein L33	5858	BC-U	7.7-fold		2.1-fold
gi|258509467|ref|YP_003172218.1|	50S ribosomal protein L6	19304	BC-U	BC-U
gi|258507891|ref|YP_003170642.1|	ribosomal subunit interface protein	21077	BC-U	BC-U		6.9-fold
gi|258508619|ref|YP_003171370.1|	ribosome recycling factor	20566		BC-U		Frc-U
gi|258508606|ref|YP_003171357.1|	ribosome-binding factor A	13301		BC-U		Frc-U
gi|258507762|ref|YP_003170513.1|	alanyl-tRNA synthetase	97300		BC-U		Frc-U
gi|258508556|ref|YP_003171307.1|	aspartyl-tRNA synthetase	67822	BC-U	BC-U
gi|258508781|ref|YP_003171532.1|	arginyl-tRNA synthetase	62482	BC-U			Glc-U
gi|258508486|ref|YP_003171237.1|	asparaginyl-tRNA synthetase	50188	BC-U	BC-U
gi|258508015|ref|YP_003170766.1|	aspartyl/glutamyl-tRNA amidotransferase subunit B	53383		BC-U		Frc-U
gi|258507843|ref|YP_003170594.1|	leucyl-tRNA synthetase	91625	BC-U			Glc-U
gi|258509327|ref|YP_003172078.1|	glutamyl-tRNA synthetase	56901	BC-U	BC-U		2.2-fold
gi|258508888|ref|YP_003171639.1|	seryl-tRNA synthetase	48880	BC-U	BC-U
gi|258508749|ref|YP_003171500.1|	threonyl-tRNA synthetase	74819	BC-U	BC-U
gi|258509579|ref|YP_003172330.1|	methionyl-tRNA synthetase/ protein secretion chaperonin, CsaA	74843	BC-U	36.6-fold		2.9-fold
gi|258509503|ref|YP_003172254.1|	lysyl-tRNA synthetase	56539	BC-U	BC-U
gi|258507749|ref|YP_003170500.1|	S-adenosylmethionine--tRNA ribosyltransferase-isomerase	40314		BC-U		Frc-U
gi|258507837|ref|YP_003170588.1|	S-adenosylmethionine synthetase	43141		BC-U		Frc-U
gi|258507745|ref|YP_003170496.1|	S-ribosylhomocysteinase	17416	BC-U	BC-U		6.3-fold
gi|258507563|ref|YP_003170314.1|	cysteine synthase	32586	BC-U	BC-U		2.1-fold
gi|258507143|ref|YP_003169894.1|	D-alanine--D-alanine ligase	39294		BC-U		Frc-U
gi|258509270|ref|YP_003172021.1|	peptidyl-prolyl isomerase	33136		BC-U		Frc-U
gi|258508742|ref|YP_003171493.1|	translation initiation factor 3	17281	BC-U	BC-U		2.5-fold
gi|258509460|ref|YP_003172211.1|	translation initiation factor IF-1	8142	BC-U	BC-U		1.9-fold
gi|258508607|ref|YP_003171358.1|	translation initiation factor IF-2	102428		BC-U		Frc-U
	Carbohydrate metabolism
gi|258508355|ref|YP_003171106.1|	1-phosphofructokinase	32400		BC-U		Frc-U
gi|258508369|ref|YP_003171120.1|	6-phosphofructokinase	34176	BC-U	BC-U
gi|258508722|ref|YP_003171473.1|	6-phosphogluconate dehydrogenase	52117	BC-U	18.2-fold
gi|258507739|ref|YP_003170490.1|	aldo/keto reductase	30878	BC-U	BC-U		3.1-fold
gi|258509828|ref|YP_003172579.1|	aldo/keto reductase	34094		BC-U		Frc-U
gi|258507429|ref|YP_003170180.1|	beta-N-acetylhexosaminidase (GH3)	64699	BC-U	10.6-fold		3.6-fold
gi|258507153|ref|YP_003169904.1|	D-lactate dehydrogenase	37036	BC-U	BC-U
gi|258508993|ref|YP_003171744.1|	dTDP-4-dehydrorhamnose 3,5-epimerase	21552	BC-U	BC-U		2.9-fold
gi|258508991|ref|YP_003171742.1|	dTDP-4-dehydrorhamnose reductase	31970	BC-U	BC-U		5.2-fold
gi|258508992|ref|YP_003171743.1|	dTDP-glucose 4,6-dehydratase	38560	BC-U	1.8-fold	Frc-U
gi|258507519|ref|YP_003170270.1|	fructose-bisphosphate aldolase	31686	BC-U	7.0-fold	Frc-U	3.9-fold
gi|258508412|ref|YP_003171163.1|	galactose mutarotase	32669		BC-U		Frc-U
gi|258509572|ref|YP_003172323.1|	galactose mutarotase	32587		BC-U		Frc-U
gi|258509908|ref|YP_003172659.1|	glucosamine-6-phosphate deaminase	26067		BC-U		Frc-U
gi|258507978|ref|YP_003170729.1|	glucosamine--fructose-6-phosphate aminotransferase	65788	BC-U	BC-U		1.5-fold
gi|258508994|ref|YP_003171745.1|	glucose-1-phosphate thymidylyltransferase	32535	BC-U	BC-U		2.3-fold
gi|258508691|ref|YP_003171442.1|	glutamine synthetase	50512	BC-U	12.5-fold
gi|258507244|ref|YP_003169995.1|	inosine-5'-monophosphate dehydrogenase	52642		10.9-fold		Frc-U
gi|258507328|ref|YP_003170079.1|	tagatose-6-phosphate ketose/aldose isomerase	43011		BC-U		Frc-U
gi|258507954|ref|YP_003170705.1|	phosphate acetyltransferase	35204		BC-U		Frc-U
gi|258507916|ref|YP_003170667.1|	phosphoglucomutase	63585	BC-U	BC-U		9.3-fold
gi|258507977|ref|YP_003170728.1|	phosphoglucosamine mutase	48851	BC-U	BC-U		3.1-fold
gi|258508317|ref|YP_003171068.1|	pyruvate dehydrogenase complex E2 component,dihydrolipoyllysine-residue acetyltransferase	46779	BC-U	BC-U		4.6-fold
gi|258508315|ref|YP_003171066.1|	pyruvate dehydrogenase E1 component subunit alpha	40699		BC-U		Frc-U
gi|258508316|ref|YP_003171067.1|	pyruvate dehydrogenase E1 component subunit beta	35219		BC-U		Frc-U
gi|258509556|ref|YP_003172307.1|	ribose-phosphate pyrophosphokinase	35478	BC-U	BC-U		1.8-fold
gi|258508857|ref|YP_003171608.1|	N-acetylglucosamine-6-phosphate deacetylase	42414	BC-U			Glc-U
	Stress, resistance and proteolysis
gi|258508153|ref|YP_003170904.1|	dipeptidase A	54322	BC-U	BC-U
gi|258509801|ref|YP_003172552.1|	serine protease - HtrA-like	45175	BC-U	2.6-fold	Frc-U	15.4-fold
gi|258507233|ref|YP_003169984.1|	pyrrolidone-carboxylate peptidase	23502	BC-U	7.2-fold	Frc-U	1.9-fold
gi|258507549|ref|YP_003170300.1|	aminopeptidase N	94487		BC-U		Frc-U
gi|258508362|ref|YP_003171113.1|	ATP-dependent chaperone ClpB1	96322	PC-U	PC-U
gi|258508818|ref|YP_003171569.1|	ATP-dependent chaperone ClpB2	81782		BC-U		Frc-U
gi|258509494|ref|YP_003172245.1|	ATP-dependent chaperone ClpC	91642		BC-U		Frc-U
gi|258509030|ref|YP_003171781.1|	ATP-dependent chaperone ClpX	78381		BC-U		Frc-U
gi|258508854|ref|YP_003171605.1|	beta-lactamase class C-like penicillin binding protein	44131		BC-U		Frc-U
gi|258507377|ref|YP_003170128.1|	penicillin-binding protein 3	69670		BC-U		Frc-U
gi|258509799|ref|YP_003172550.1|	Hsp20 family small heat shock protein	16633	BC-U	BC-U		2.8-fold
gi|258508600|ref|YP_003171351.1|	HSP-70 Cofactor HSP20	21822	BC-U	BC-U		1.5-fold
gi|258509237|ref|YP_003171988.1|	LytR family transcriptional regulator	39117	BC-U	BC-U		10.1-fold
gi|258509896|ref|YP_003172647.1|	phage-related prohead protease	56962	BC-U	BC-U
gi|258508463|ref|YP_003171214.1|	nitroreductase family protein	22746	BC-U	BC-U		3.5-fold
gi|258509146|ref|YP_003171897.1|	UspA family universal stress protein	16874	BC-U	BC-U
gi|258508203|ref|YP_003170954.1|	universal stress protein family	18219	BC-U	BC-U		1.5-fold
gi|258507670|ref|YP_003170421.1|	small heat shock protein	17820	BC-U	BC-U		3.5-fold
gi|258508290|ref|YP_003171041.1|	tellurite resistance protein	44104			Frc-U	Frc-U
gi|258507915|ref|YP_003170666.1|	thioredoxin reductase	34270	BC-U			Glc-U
gi|258509519|ref|YP_003172270.1|	ErfK/YbiS/YcfS/YnhG family protein (transpeptidase)	50215	PC-U	2.6-fold	Glc-U	Frc-U
gi|258509524|ref|YP_003172275.1|	ErfK/YbiS/YcfS/YnhG family protein (transpeptidase)	26318	BC-U		Frc-U	4.2-fold
	Transcription and nucleoside metabolism
gi|258509456|ref|YP_003172207.1|	DNA-directed RNA polymerase subunit alpha	34837	BC-U	7.8-fold	Frc-U	1.8-fold
gi|258509493|ref|YP_003172244.1|	DNA-directed RNA polymerase subunit beta	133938	BC-U	16.1-fold
gi|258509492|ref|YP_003172243.1|	DNA-directed RNA polymerase subunit beta'	137049	BC-U	BC-U
gi|258507242|ref|YP_003169993.1|	GTP-dependent nucleic acid-binding protein EngD	40281	BC-U	BC-U		4.7-fold
gi|258508456|ref|YP_003171207.1|	bifunctional pyrimidine regulatory protein PyrR/uracil phosphoribosyltransferase	20458		5.9-fold		Frc-U
gi|258508963|ref|YP_003171714.1|	GMP synthase	57830	BC-U			Glc-U
gi|258508708|ref|YP_003171459.1|	transcription elongation factor GreA	17145		BC-U		Frc-U
gi|258508610|ref|YP_003171361.1|	transcription elongation factor NusA	44546	BC-U			Glc-U
gi|258509461|ref|YP_003172212.1|	adenylate kinase	23923	BC-U			Glc-U
gi|258507128|ref|YP_003169879.1|	adenylosuccinate synthetase	47335	BC-U	BC-U
gi|258508170|ref|YP_003170921.1|	uracil phosphoribosyltransferase	22780	BC-U	BC-U
Miscellaneous
gi|258507825|ref|YP_003170576.1|	sulfatase	77924		27.9-fold	Frc-U	Frc-U
gi|258508077|ref|YP_003170828.1|	sulfatase	84067		1.5-fold	Frc-U	Frc-U
gi|258508419|ref|YP_003171170.1|	Manganese-dependent inorganic pyrophosphatase	33501	BC-U	BC-U		3.2-fold
gi|258509048|ref|YP_003171799.1|	capsular polysaccharide biosynthesis chain length regulator	34112	BC-U			Glc-U
gi|258509199|ref|YP_003171950.1|	CRISPR-associated protein Csn1	156557	BC-U			Glc-U
gi|258507111|ref|YP_003169862.1|	hypothetical protein LGG_00116	13682	PC-U		Glc-U
gi|258507213|ref|YP_003169964.1|	hypothetical protein LGG_00218	7836	BC-U	BC-U		2.1-fold
gi|258507582|ref|YP_003170333.1|	hypothetical protein LGG_00587	72910	PC-U	PC-U
gi|258507716|ref|YP_003170467.1|	hypothetical protein LGG_00721	33691		BC-U		Frc-U
gi|258507764|ref|YP_003170515.1|	hypothetical protein LGG_00769	10115		BC-U		Frc-U
gi|258507785|ref|YP_003170536.1|	hypothetical protein LGG_00790	17876		BC-U		Frc-U
gi|258507981|ref|YP_003170732.1|	hypothetical protein LGG_00986	27080	BC-U	BC-U
gi|258508108|ref|YP_003170859.1|	hypothetical protein LGG_01113	16692		BC-U		Frc-U
gi|258508350|ref|YP_003171101.1|	hypothetical protein LGG_01355	5997		BC-U		Frc-U
gi|258508466|ref|YP_003171217.1|	hypothetical protein LGG_01471	12418		BC-U		Frc-U
gi|258508594|ref|YP_003171345.1|	hypothetical protein LGG_01599	14258	BC-U	BC-U
gi|258508688|ref|YP_003171439.1|	hypothetical protein LGG_01693	45372	BC-U	2.2-fold	Frc-U
gi|258508777|ref|YP_003171528.1|	hypothetical protein LGG_01782	13295	BC-U	BC-U
gi|258509097|ref|YP_003171848.1|	hypothetical protein LGG_02102	99177	BC-U	1.5-fold	Frc-U	7.1-fold
gi|258509207|ref|YP_003171958.1|	hypothetical protein LGG_02212	17935	BC-U			Glc-U
gi|258509260|ref|YP_003172011.1|	hypothetical protein LGG_02265	11601	BC-U	6.4-fold		2.8-fold
gi|258509368|ref|YP_003172119.1|	hypothetical protein LGG_02373	20127		BC-U		Frc-U
gi|258509627|ref|YP_003172378.1|	hypothetical protein LGG_02632	12741	BC-U	BC-U		3.9-fold
gi|258509883|ref|YP_003172634.1|	hypothetical protein LGG_02888	8144			Frc-U	Frc-U
gi|258509886|ref|YP_003172637.1|	hypothetical protein LGG_02891	10028	BC-U			Glc-U
gi|258509213|ref|YP_003171964.1|	XRE family transcriptional regulator	14033	BC-U	BC-U		1.6-fold
gi|258507503|ref|YP_003170254.1|	dihydroxyacetone kinase	20636	BC-U	BC-U		7.2-fold
gi|258509114|ref|YP_003171865.1|	acyl carrier protein	8957	BC-U	BC-U		1.5-fold
gi|258508653|ref|YP_003171404.1|	acyl carrier protein	9049		BC-U		Frc-U
